# Supplementary material for: Impact of long-range van der Waals forces on chiral recognition in a Cinchona alkaloid chiral selector system
Source: Royal Society of Chemistry journal article supplement (doi:10.1039/c3cp44444a), 2013-01-01
Supplement: c3cp44444a.pdf [file c3cp44444a.pdf]

# Impact of Long-Range van der Waals Forces on Chiral Recognition in a Cinchona Alkaloid Chiral Selector System

Petr Milko,<sup>‡\*</sup> Jana Roithová,<sup>a</sup> Kevin A. Schug<sup>b</sup> and Karel Lemr<sup>c</sup>

## Electronic Supplementary Information

### Contents

|                                                                       |    |
|-----------------------------------------------------------------------|----|
| 1. The NCI Plots and the Optimized Structures .....                   | 2  |
| 2. The NBO Analysis of the 1 <sub>s</sub> Na <sup>+</sup> Isomer..... | 9  |
| 3. The Relaxed Potential Energy Surface Scans.....                    | 10 |
| 4. Optimized Geometries (XYZ coordinates) of the Complexes.....       | 11 |
| 5. References .....                                                   | 17 |

<sup>a</sup> Charles University in Prague, Faculty of Science, Department of Organic Chemistry, Hlavova 8, 12843 Prague 2, Czech Republic. Tel: +420-221-951-322; E-mail: [petr.milko@weizmann.ac.il](mailto:petr.milko@weizmann.ac.il), [jana.roithova@natur.cuni.cz](mailto:jana.roithova@natur.cuni.cz)

<sup>b</sup> Department of Chemistry & Biochemistry, The University of Texas at Arlington, 700 Planetarium Pl., Arlington, TX 76019-0065 USA. Tel: +1-817-272-3541; E-mail: [kschug@uta.edu](mailto:kschug@uta.edu)

<sup>c</sup> Regional Centre of Advanced Technologies and Materials, Department of Analytical Chemistry, Faculty of Science, Palacký University, 17. listopadu 12, 77146 Olomouc, Czech Republic. Tel: +420-585-634-415; E-mail: [karel.lemr@upol.cz](mailto:karel.lemr@upol.cz)

<sup>†</sup> Electronic Supplementary Information (ESI) available: Comparison of different functionals and basis sets, NBO charges and xyz coordinates of the all optimized structures are posted. See DOI: 10.1039/b000000x/

<sup>‡</sup>Present address: Department of Chemical Research Support, Weizmann Institute of Science, Rehovot 76100, Israel. Tel: +972-8-934-6218

## 1. The NCI Plots and the Optimized Structures

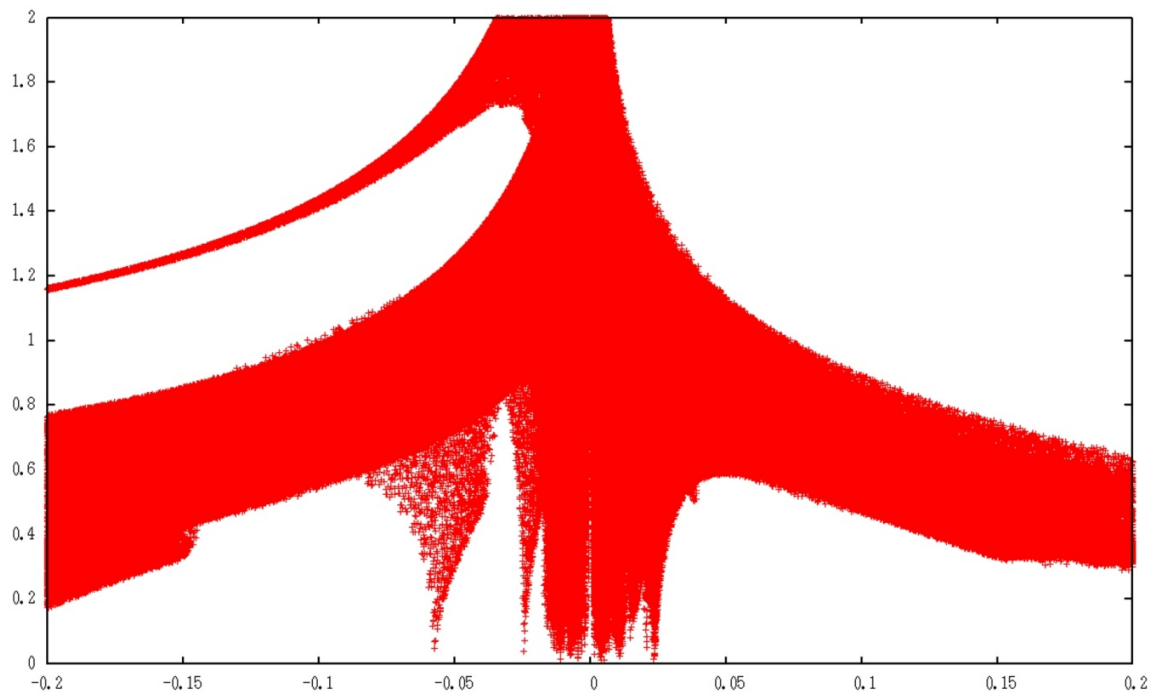

**Fig. S1** Dependence of the reduced density gradient on the electron density multiplied by the sign of the second Hessian eigenvalue, so called NCIplot for  $2s\text{Na}^+$ .

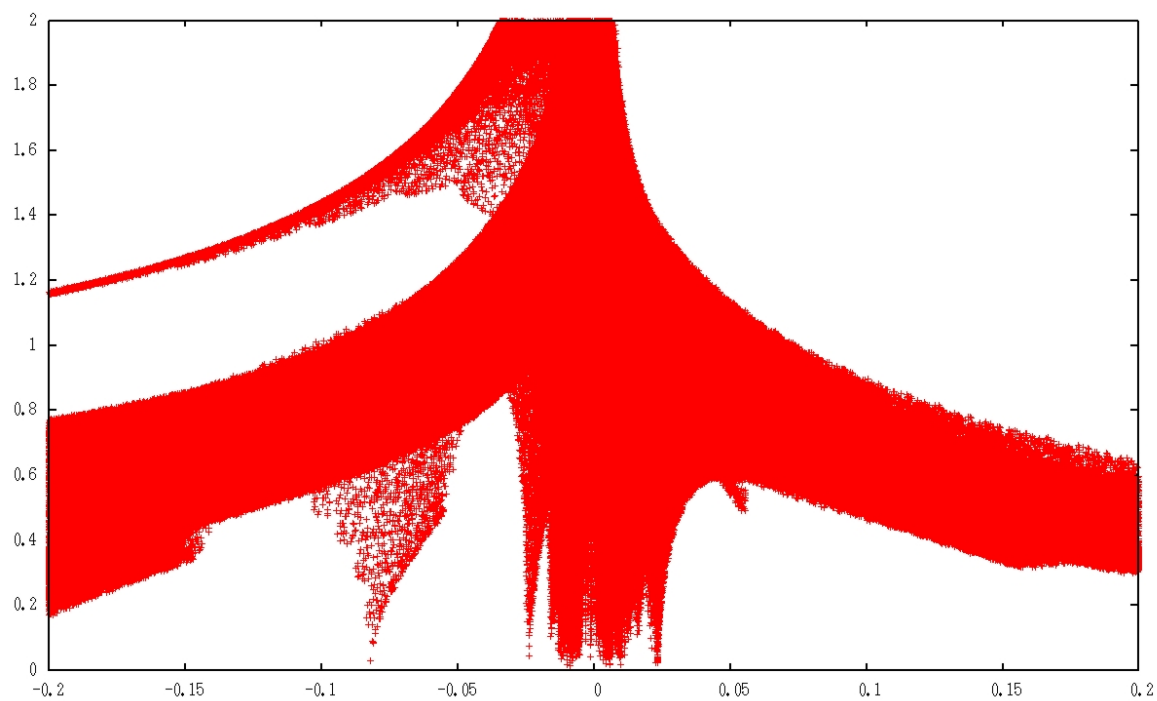

**Fig. S2** Dependence of the reduced density gradient on the electron density multiplied by the sign of the second Hessian eigenvalue, so called NCIplot for  $3s\text{Na}^+$ .

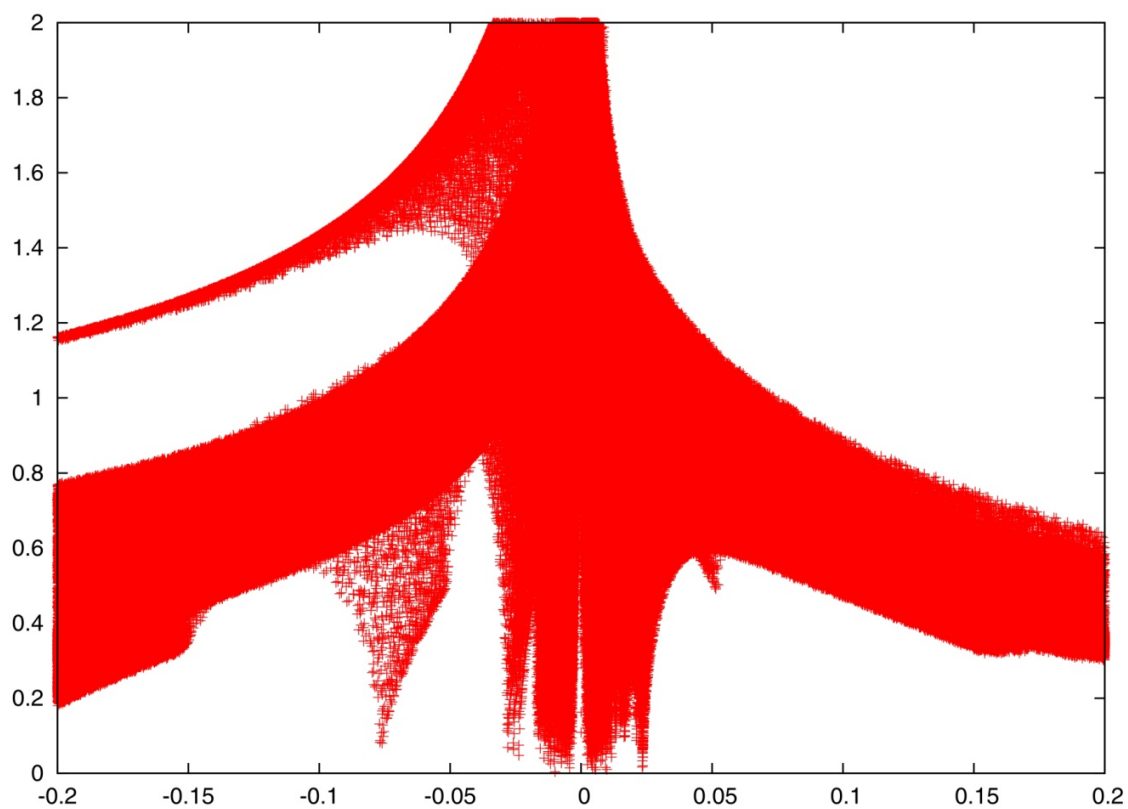

**Fig. S3** Dependence of the reduced density gradient on the electron density multiplied by the sign of the second Hessian eigenvalue, so called NCIplot for  $1_R\text{Na}^+$ .

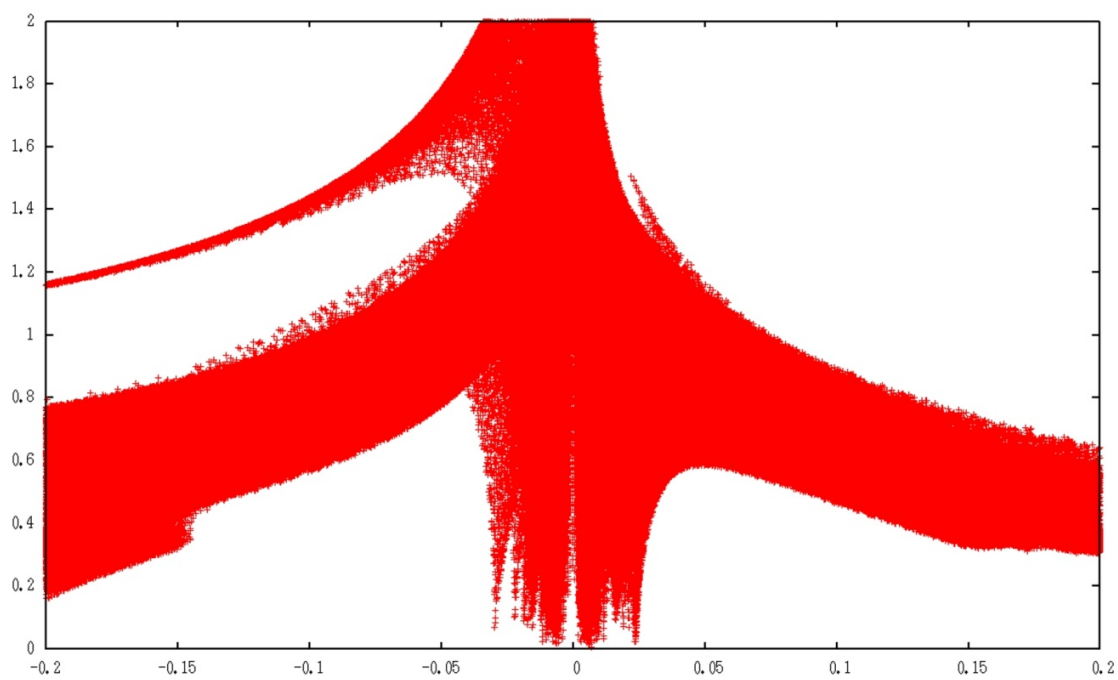

**Fig. S4** Dependence of the reduced density gradient on the electron density multiplied by the sign of the second Hessian eigenvalue, so called NCIplot for  $2_R\text{Na}^+$ .

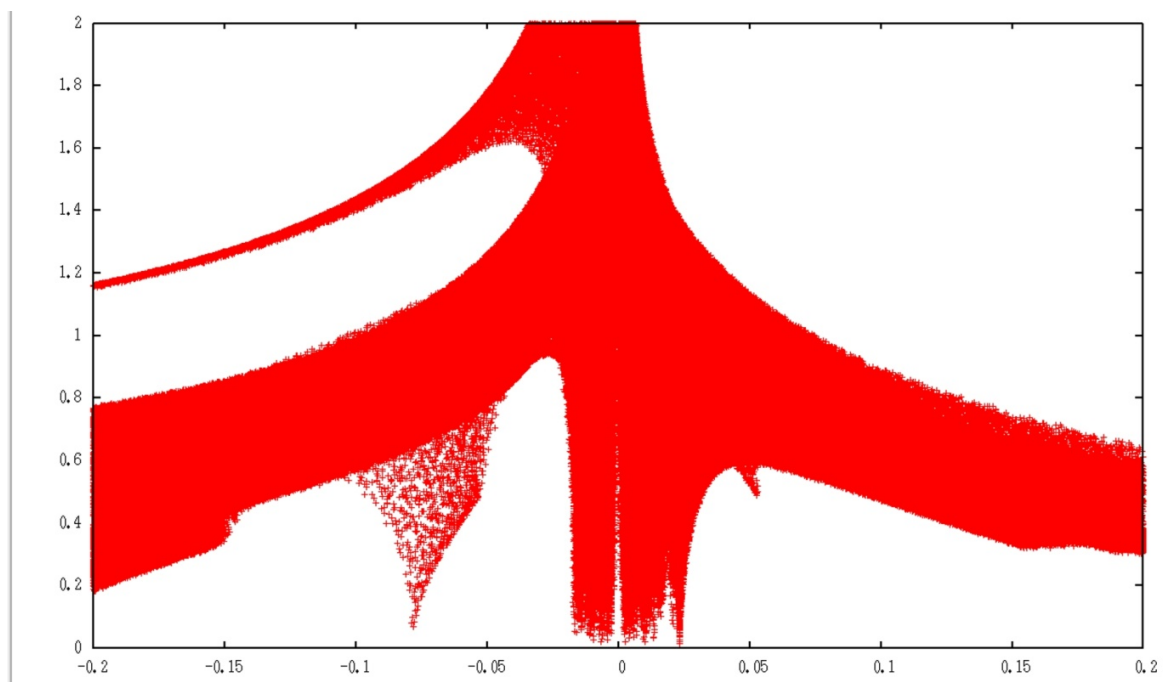

**Fig. S5** Dependence of the reduced density gradient on the electron density multiplied by the sign of the second Hessian eigenvalue, so called NCIplot for  $3RNa^+$ .

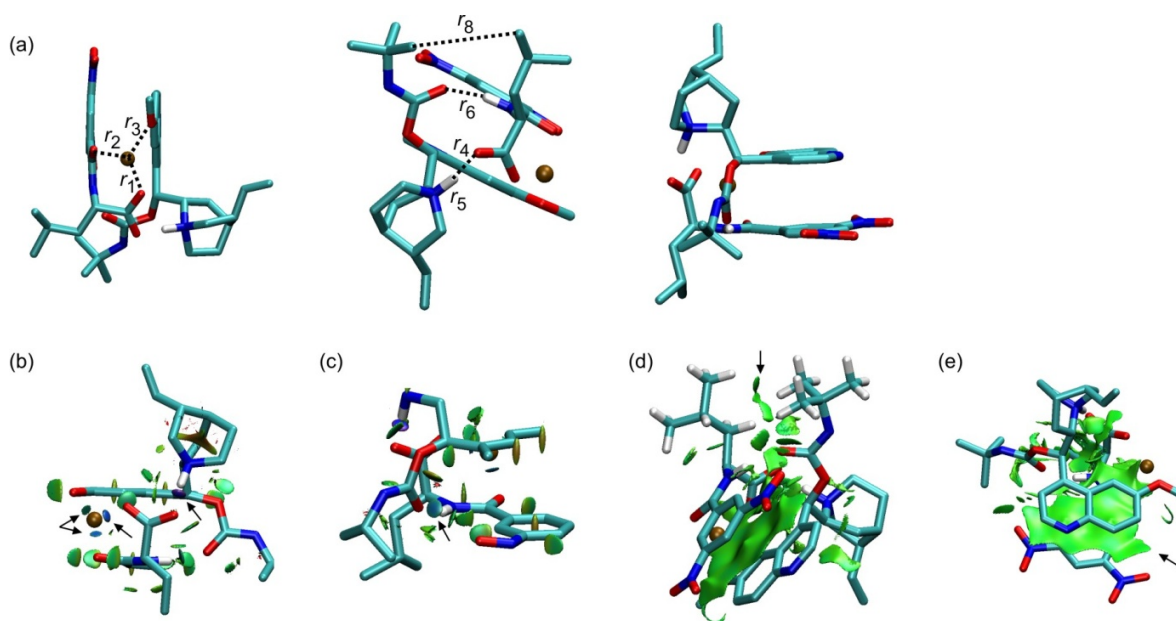

**Fig. S6** The optimized structures of the  $1sLi^+$  complex (B97D/6-311++G\*\*/DFBS). Hydrogen atoms were removed except of important ones to improve the clarity of the pictures. Colour codes: light blue, white, red, blue, and brown correspond to carbon, hydrogen, oxygen, nitrogen, and lithium, respectively. Colour codes of the isosurfaces: the weak-, the strong attractive-, and the strong repulsive interactions are in green, blue, and red, respectively. The black arrows indicate the isosurfaces discussed in the text.

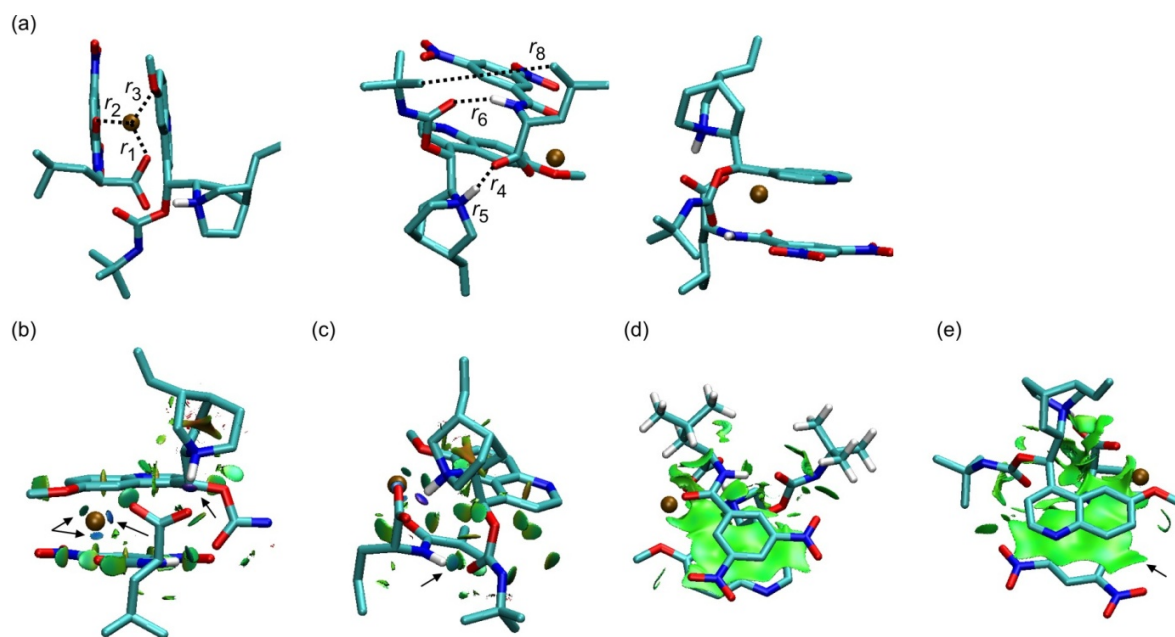

**Fig. S7** The optimized structures of the  $1_R\text{Li}^+$  complex (B97D/6-311++G\*\*/DFBS). Hydrogen atoms were removed except of important ones to improve the clarity of the pictures. Colour codes: light blue, white, red, blue, and brown correspond to carbon, hydrogen, oxygen, nitrogen, and lithium, respectively. Colour codes of the isosurfaces: the weak-, the strong attractive-, and the strong repulsive interactios are in green, blue, and red, respectively. The black arrows indicate the isosurfaces discussed in the text.

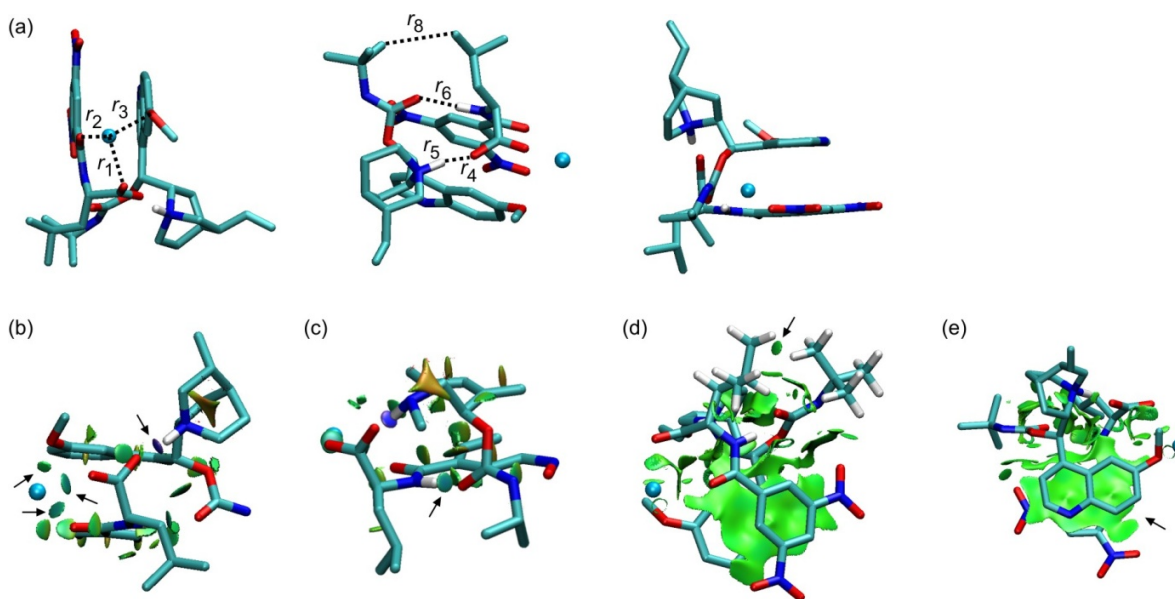

**Fig. S8** The optimized structures of the  $1_S\text{K}^+$  complex (B97D/6-311++G\*\*/DFBS). Hydrogen atoms were removed except of the important ones to improve the clarity of the pictures. Colour codes: light blue, white, red, blue, and cyan correspond to carbon, hydrogen, oxygen, nitrogen, and potassium, respectively. Colour codes of the isosurfaces: the weak-, the strong attractive-, and the strong repulsive interactios are in green, blue, and red, respectively. The black arrows indicate the isosurfaces discussed in the text.

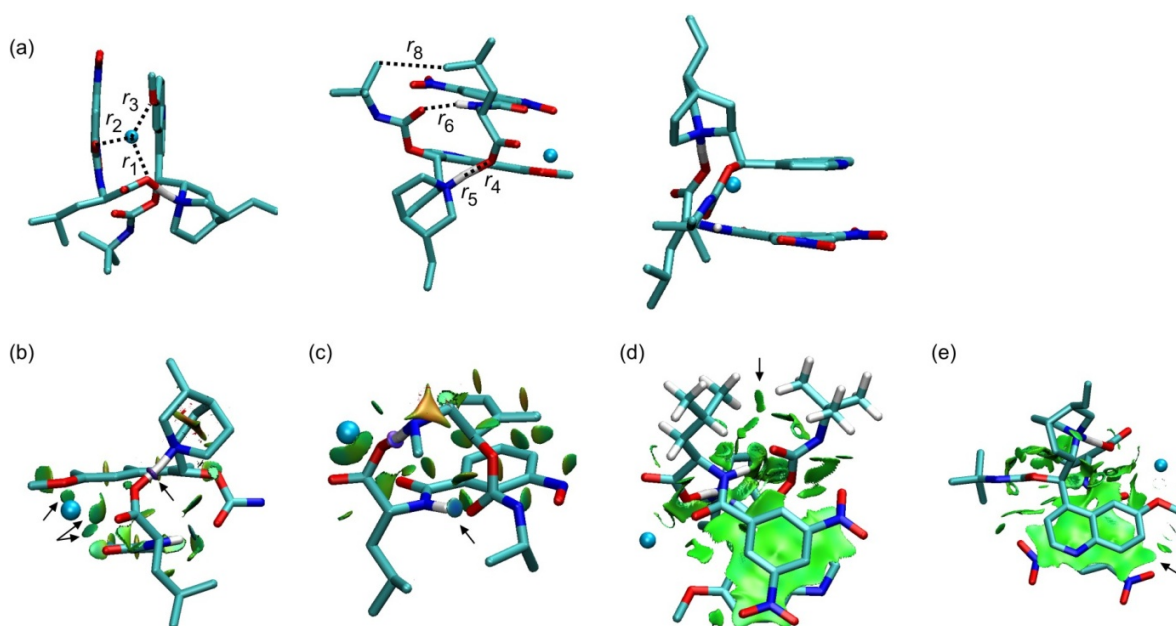

**Fig. S9** The optimized structures of the  $1R^+$  complex (B97D/6-311++G\*\*/DFBS). Hydrogen atoms were removed except of the important ones to improve the clarity of the pictures. Colour codes: light blue, white, red, blue, and cyan correspond to carbon, hydrogen, oxygen, nitrogen, and potassium, respectively. Colour codes of the isosurfaces: the weak-, the strong attractive-, and the strong repulsive interactions are in green, blue, and red, respectively. The black arrows indicate the isosurfaces discussed in the text.

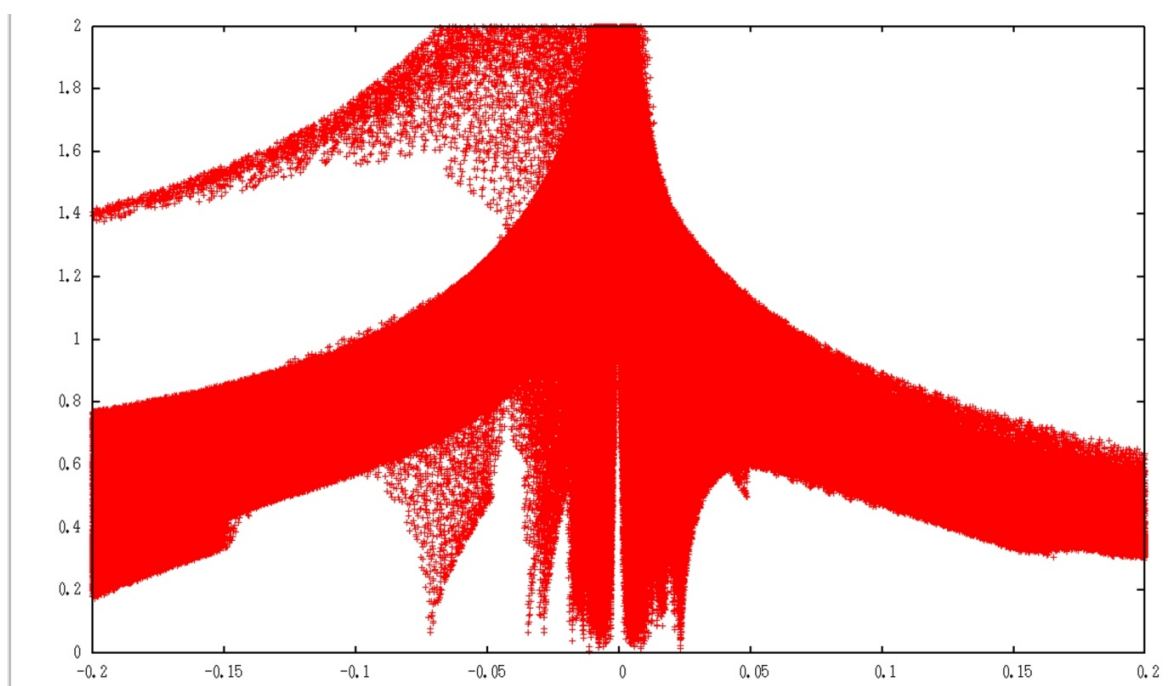

**Fig. S10** Dependence of the reduced density gradient on the electron density multiplied by the sign of the second Hessian eigenvalue - so called NCI plot for  $1S Li^+$ .

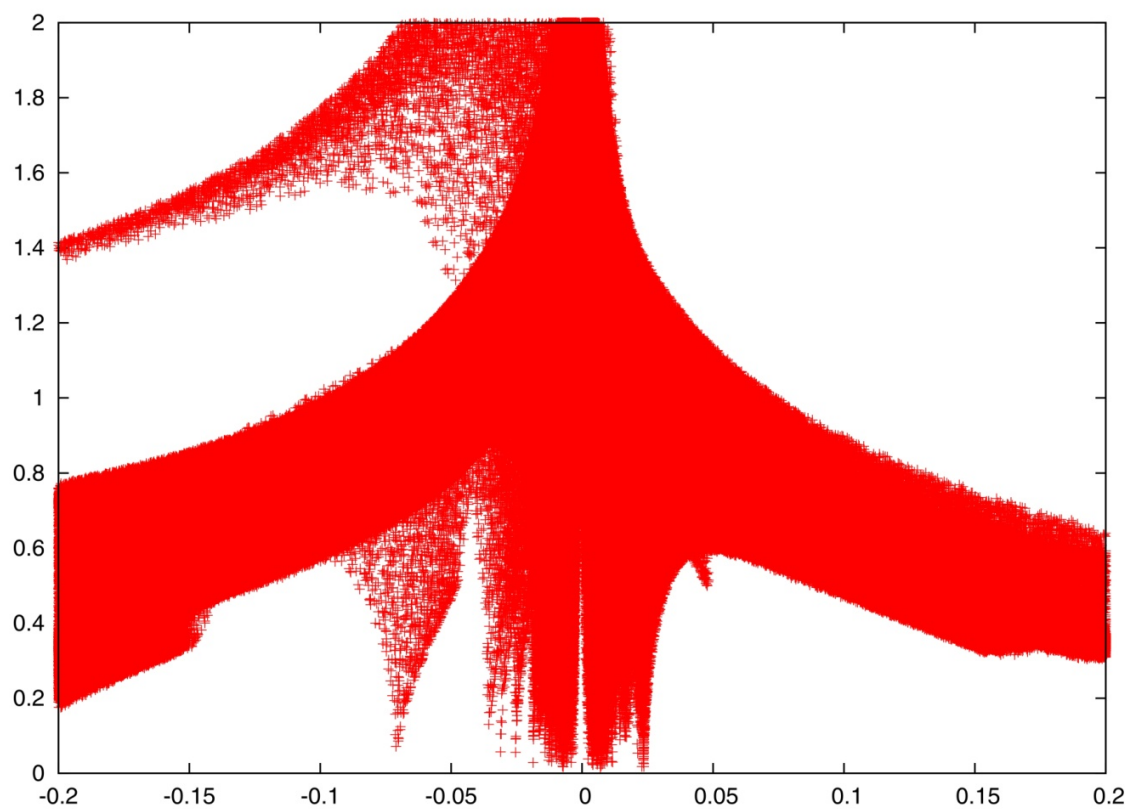

**Fig. S11** Dependence of the reduced density gradient on the electron density multiplied by the sign of the second Hessian eigenvalue - so called NCI plot for  $1R\text{Li}^+$ .

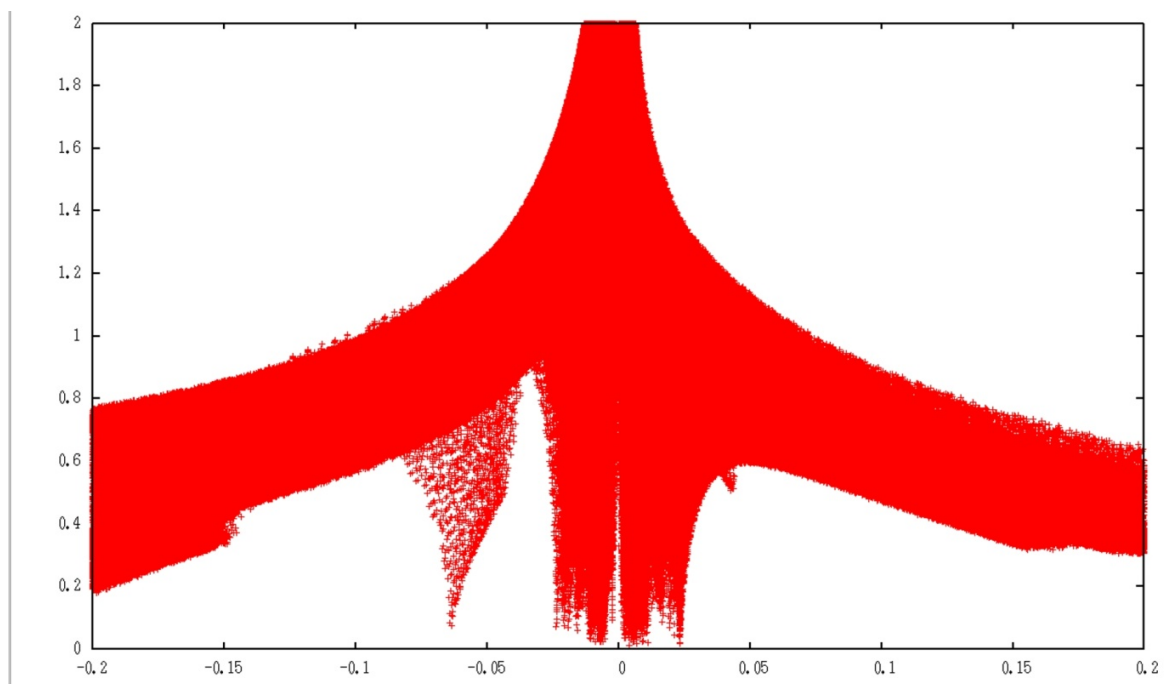

**Fig. S12** Dependence of the reduced density gradient on the electron density multiplied by the sign of the second Hessian eigenvalue - so called NCI plot for  $1S\text{K}^+$ .

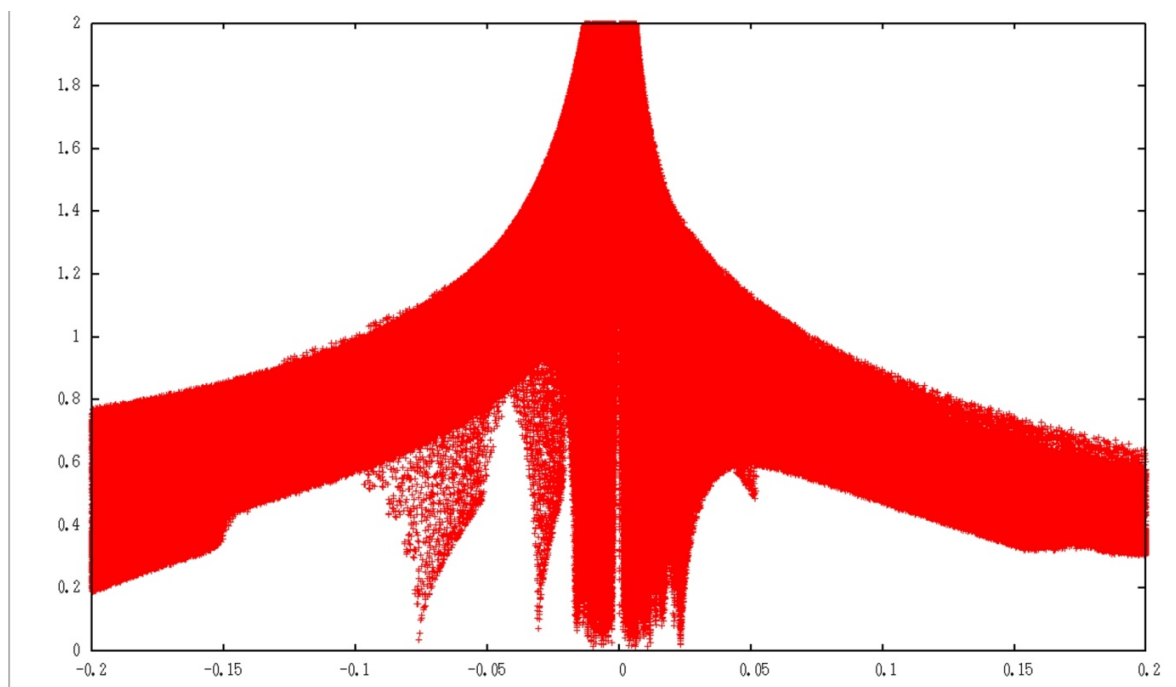

**Fig. S13** Dependence of the reduced density gradient on the electron density multiplied by the sign of the second Hessian eigenvalue - so called NCIplot for  $1_{\text{R}}\text{K}^+$ .



## 2. The NBO Analysis of the $1sNa^+$ Isomer

The NBO analysis of  $1sNa^+$  isomer was done at the PBE0/6-311G\*\*//B97D/6-311++G\*\*/DFBS level of theory using the NBO program version 3.1 as is implemented in Gaussian 09.<sup>S1,S2</sup> Wiberg bond indexes (WBI) of about 1.4 of both C-O bonds in the carboxylate group demonstrate the  $\pi$ -electron delocalization over the  $COO^-$  group. In the main text, it is shown using the NCI plot that the  $O^-(3)-H^+(4)$  ionic pair has a non-negligible covalent character. This agrees with a low value of WBI of the  $O^-(3)-H^+(4)$  pair. The strong interaction of between  $O^-(3)$  and  $H^+(4)$  affects the  $H^+(4)-N(5)$  bond resulting in a low WBI of the  $H^+(4)-N(5)$  bond. One lone pair orbital of  $O^-(3)$  is involved in the charge transfer to the  $\sigma^*$  orbital of the  $H^+(4)-N(5)$  bond, while the second one is involved in the delocalization of the electrons over the  $COO^-$  moiety. In summary, the Lewis structure can be draw as the  $COO^-$  moiety with delocalized  $\pi$ -electrons that interacts with the  $\sigma^*$  orbital of the  $H^+(4)-N(5)$  bond. This interaction has mostly Coulombic character however it has a slight covalent character in agreement with the NCI plot.

**Table S1.** The WBI's and NBO analysis of bonds involved in the  $O^-(3)-H^+(4)$  ionic pair interaction.

|                                 | $Na^+ - O(1)$ | $O(1) - C(2)$ | $C(2) - O^-(3)$ | $O^-(3) - H^+(4)$ | $H^+(4) - N(5)$ |
|---------------------------------|---------------|---------------|-----------------|-------------------|-----------------|
| WBI <sup>a</sup>                | 0.0687        | 1.4114        | 1.4361          | 0.1599            | 0.5634          |
| occupancy of $\sigma$ orbital   | -             | 1.99512       | 1.99361         |                   | 1.97472         |
| occupancy of $\sigma^*$ orbital | -             | 0.04891       | 0.04936         |                   | 0.12261         |

<sup>a</sup>Wiberg bond index

**Table S2.** Occupancies of lone pair orbitals of atoms involved in the  $O^-(3)-H^+(4)$  ionic pair interaction.

|          | LP <sup>1</sup> | LP <sup>2</sup> | LP <sup>3</sup> | LP <sup>4</sup> |
|----------|-----------------|-----------------|-----------------|-----------------|
| $Na^+$   | 0.04429         | 0.03127         | 0.02649         | 0.00872         |
| O(1)     | 1.95246         | 1.89951         | 1.63069         | -               |
| $O^-(3)$ | 1.95928         | 1.83017         | 1.60514         | -               |

### 3. The Relaxed Potential Energy Surface Scans

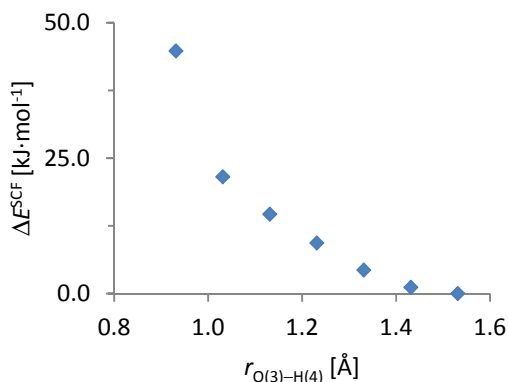

**Fig. S14** The relaxed PES scan of the proton migration from N(5) to O(3) in  $1sNa^+$  at the B97D/6-311++G\*\*/DFBS level of theory.

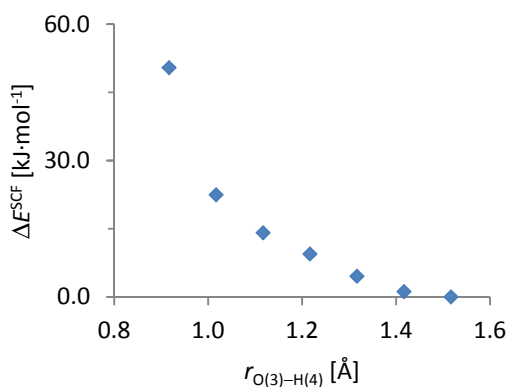

**Fig. S15** The relaxed PES scan of the proton migration from N(5) to O(3) in  $1sNa^+$  at the B97D/6-311++G\*\*/DFBS level of theory.

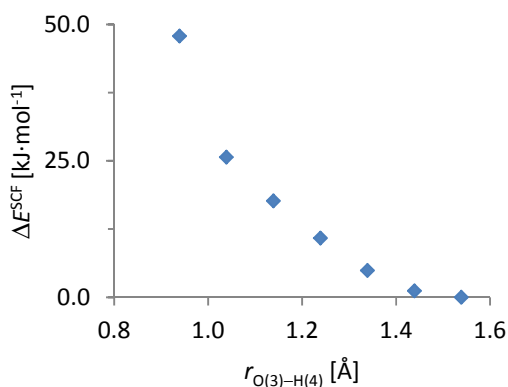

**Fig. S16** The relaxed PES scan of the proton migration from N(5) to O(3) in  $1sLi^+$  at the B97D/6-311++G\*\*/DFBS level of theory.

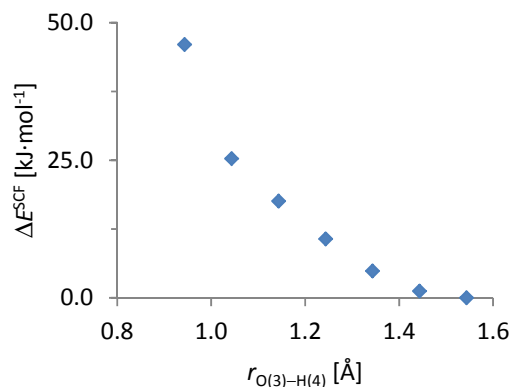

**Fig. S17** The relaxed PES scan of the proton migration from N(5) to O(3) in  $1sLi^+$  at the B97D/6-311++G\*\*/DFBS level of theory.

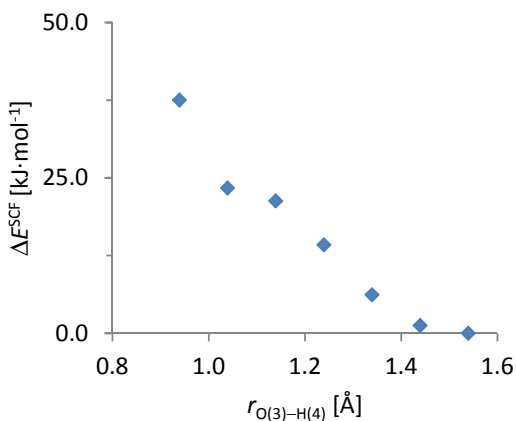

**Fig. S18** The relaxed PES scan of the proton migration from N(5) to O(3) in  $1sK^+$  at the B97D/6-311++G\*\*/DFBS level of theory.

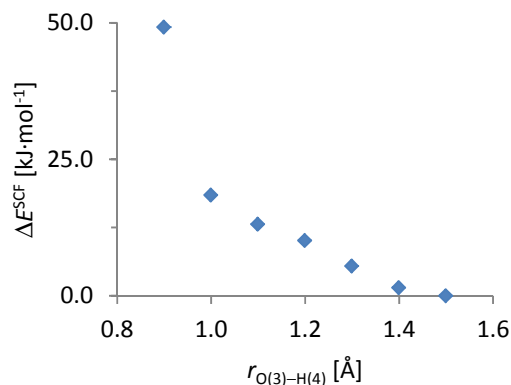

**Fig. S19** The relaxed PES scan of the proton migration from N(5) to O(3) in  $1sK^+$  at the B97D/6-311++G\*\*/DFBS level of theory.

#### 4. Optimized Geometries (XYZ coordinates) of the Complexes

$I_sNa^+$  69 6 0 -1.961121 -1.724212 0.788496  
 70 6 0 -2.196560 -2.525868 -1.478653  
 E(RB97D) = -2718.800758 A.U. 71 6 0 -3.328494 -1.408123 0.788874  
 NImag = 0 72 6 0 -3.551018 -2.196119 -1.513807  
 73 6 0 -4.089237 -1.633747 -0.355811  
 74 1 0 0.467581 -0.793240 3.923837  
 75 1 0 0.634327 -1.564074 1.062975  
 76 1 0 -0.341215 -2.567417 -0.420994  
 77 1 0 -3.781660 -0.967936 1.669652  
 78 1 0 -4.149047 -2.347111 -2.406253  
 79 7 0 0.161698 -1.319043 1.936493  
 80 7 0 -1.569055 -3.095393 -2.717322  
 81 7 0 -5.523044 -1.196162 -0.362254  
 82 8 0 -0.349750 -3.268311 -2.702677  
 83 8 0 -1.801125 -0.947565 3.043953  
 84 8 0 -2.306646 -3.33257 -3.667240  
 85 8 0 -5.957340 -0.671274 0.664038  
 86 8 0 -6.159928 -1.362575 -1.396662  
 87 6 0 1.545896 0.562316 2.600133  
 88 8 0 0.718035 1.515211 2.738489  
 89 8 0 2.680838 0.669522 2.055075  
 90 6 0 1.742650 -3.318566 3.512056  
 91 6 0 0.874749 -3.384227 4.781561  
 92 6 0 2.208455 -1.882255 3.198709  
 93 6 0 2.969690 -4.238397 3.639638  
 94 1 0 1.428378 -2.979320 5.643462  
 95 1 0 1.136620 -3.672776 2.662533  
 96 1 0 2.662014 -5.278521 3.815255  
 97 1 0 0.606607 -4.424246 5.012632  
 98 1 0 -0.058698 -2.814466 4.670716  
 99 1 0 3.598898 -3.923578 4.486314  
 100 1 0 2.845886 -1.515795 4.017745  
 101 1 0 2.825706 -1.876416 2.291291  
 102 1 0 3.585512 -4.208837 2.729210  
 103 11 0 -1.388253 1.251937 3.475539

E(RPBE1PBE) = -2717.44150274 A.U.

Standard orientation:  
 -----  
 Center Atomic Atomic Coordinates (Angstroms)  
 Number Number Type X Y Z  
 -----

| Center Number | Atomic Number | Atomic Type | X         | Y         | Z         |
|---------------|---------------|-------------|-----------|-----------|-----------|
| 1             | 6             | 0           | -0.140651 | 0.687712  | -1.603809 |
| 2             | 6             | 0           | -0.102331 | 0.194538  | -2.894937 |
| 3             | 6             | 0           | -1.616369 | 1.536484  | 0.267246  |
| 4             | 6             | 0           | -1.411841 | 1.078633  | -1.062883 |
| 5             | 6             | 0           | 1.138417  | 0.857282  | -0.793601 |
| 6             | 6             | 0           | -1.298236 | 0.093568  | -3.653591 |
| 7             | 6             | 0           | 3.146398  | -3.943134 | -2.236577 |
| 8             | 6             | 0           | 2.508166  | -1.108086 | -1.109153 |
| 9             | 6             | 0           | -2.885448 | 1.912904  | 0.693212  |
| 10            | 6             | 0           | -2.550749 | 0.980308  | -1.945153 |
| 11            | 6             | 0           | 4.162917  | -2.934998 | -1.669736 |
| 12            | 6             | 0           | -3.996715 | 1.870563  | -0.187945 |
| 13            | 6             | 0           | -3.822680 | 1.404907  | -1.476225 |
| 14            | 6             | 0           | 4.514360  | -3.268540 | -0.207224 |
| 15            | 6             | 0           | 5.439834  | -2.923733 | -2.527759 |
| 16            | 1             | 0           | -0.788565 | 1.574719  | 0.973135  |
| 17            | 1             | 0           | 0.836582  | -0.127738 | -3.335995 |
| 18            | 1             | 0           | 2.218963  | -3.930952 | -1.655258 |
| 19            | 1             | 0           | 1.000369  | 0.422627  | 0.198337  |
| 20            | 1             | 0           | 2.909775  | -3.708257 | -3.282778 |
| 21            | 1             | 0           | -1.262014 | -0.320297 | -4.662918 |
| 22            | 1             | 0           | 3.577400  | -4.952159 | -2.193670 |
| 23            | 1             | 0           | 3.613602  | -3.288880 | 0.414462  |
| 24            | 1             | 0           | 4.038351  | -0.905115 | -2.406264 |
| 25            | 1             | 0           | 4.988574  | -4.258049 | -0.171208 |
| 26            | 1             | 0           | 5.207928  | -2.666841 | -3.571909 |
| 27            | 1             | 0           | -4.985810 | 2.169496  | 0.143104  |
| 28            | 1             | 0           | 5.892500  | -3.921937 | -2.515546 |
| 29            | 1             | 0           | -4.663745 | 1.335828  | -2.162749 |
| 30            | 1             | 0           | 5.215939  | -2.528205 | 0.200623  |
| 31            | 1             | 0           | 6.173595  | -2.206851 | -2.131717 |
| 32            | 7             | 0           | -2.482860 | 0.483875  | -3.215343 |
| 33            | 7             | 0           | 3.603868  | -1.545862 | -1.754396 |
| 34            | 8             | 0           | 1.808951  | -1.756344 | -0.338460 |
| 35            | 8             | 0           | 2.269062  | 0.225421  | -1.425863 |
| 36            | 6             | 0           | -4.301745 | 2.715600  | 2.498448  |
| 37            | 1             | 0           | -4.658736 | 3.590656  | 1.939382  |
| 38            | 1             | 0           | -5.020319 | 1.889318  | 2.411180  |
| 39            | 1             | 0           | -4.158208 | 2.984984  | 3.549873  |
| 40            | 8             | 0           | -2.996877 | 2.308995  | 2.016005  |
| 41            | 6             | 0           | 1.453110  | 2.354367  | -0.622758 |
| 42            | 6             | 0           | 1.667640  | 3.168783  | -1.916402 |
| 43            | 6             | 0           | 0.818625  | 5.588402  | -0.287517 |
| 44            | 6             | 0           | 0.525807  | 6.892504  | -0.230132 |
| 45            | 6             | 0           | 2.423337  | 3.995269  | 0.905153  |
| 46            | 6             | 0           | 2.221153  | 5.033349  | -0.252066 |
| 47            | 6             | 0           | 2.631398  | 4.335379  | -1.589231 |
| 48            | 6             | 0           | 3.968801  | 2.579433  | -0.387908 |
| 49            | 6             | 0           | 4.048428  | 3.745055  | -1.409903 |
| 50            | 1             | 0           | 0.595381  | 2.764566  | -0.084973 |
| 51            | 1             | 0           | 0.005936  | 4.861719  | -0.372848 |
| 52            | 1             | 0           | 0.697298  | 3.530567  | -2.272499 |
| 53            | 1             | 0           | -0.502766 | 7.248348  | -0.271787 |
| 54            | 1             | 0           | 1.559823  | 3.919640  | 1.573889  |
| 55            | 1             | 0           | 2.100895  | 2.538839  | -2.703911 |
| 56            | 1             | 0           | 2.645996  | 1.874629  | 1.110985  |
| 57            | 1             | 0           | 1.311592  | 7.644791  | -0.141964 |
| 58            | 1             | 0           | 4.046522  | 1.599700  | -0.858697 |
| 59            | 1             | 0           | 2.622657  | 5.075086  | -2.396789 |
| 60            | 1             | 0           | 3.313366  | 4.217103  | 1.503904  |
| 61            | 1             | 0           | 2.918938  | 5.865382  | -0.089753 |
| 62            | 1             | 0           | 4.721909  | 2.653330  | 0.403627  |
| 63            | 1             | 0           | 4.425504  | 3.370962  | -2.369649 |
| 64            | 1             | 0           | 4.738387  | 4.522927  | -1.058163 |
| 65            | 7             | 0           | 2.627524  | 2.620916  | 0.312961  |
| 66            | 6             | 0           | 1.068599  | -0.871234 | 3.011581  |
| 67            | 6             | 0           | -1.184199 | -1.318328 | 2.020939  |
| 68            | 6             | 0           | -1.390441 | -2.300192 | -0.359103 |

$2_sNa^+$

E(RB97D) = -2718.74624108 A.U.  
 NImag = 0

Zero-point correction= 0.819094 (Hartree/Particle)  
 Thermal correction to Energy= 0.874057  
 Thermal correction to Enthalpy= 0.875001  
 Thermal correction to Gibbs Free Energy= 0.727928  
 Sum of electronic and zero-point Energies= -2717.927148  
 Sum of electronic and thermal Energies= -2717.872184  
 Sum of electronic and thermal Enthalpies= -2717.871240  
 Sum of electronic and thermal Free Energies= -2718.018313

E(RPBE1PBE) = -2717.37458519 A.U.

Standard orientation:  
 -----  
 Center Atomic Atomic Coordinates (Angstroms)  
 Number Number Type X Y Z  
 -----

| Center Number | Atomic Number | Atomic Type | X         | Y         | Z         |
|---------------|---------------|-------------|-----------|-----------|-----------|
| 1             | 6             | 0           | -0.002015 | -1.139443 | 1.105547  |
| 2             | 6             | 0           | -0.135701 | -1.108992 | 2.491117  |
| 3             | 6             | 0           | 1.254235  | -0.630642 | 0.416184  |
| 4             | 6             | 0           | -1.046343 | -1.750504 | 0.330063  |
| 5             | 6             | 0           | -1.088512 | -1.731576 | -1.091887 |
| 6             | 6             | 0           | -1.240417 | -1.751897 | 3.109249  |
| 7             | 6             | 0           | 1.894971  | 1.406447  | 1.516251  |
| 8             | 6             | 0           | -2.084200 | -2.442833 | 1.066610  |
| 9             | 6             | 0           | 1.840814  | 3.752414  | 3.553194  |
| 10            | 6             | 0           | -2.101524 | -2.413873 | -1.767989 |
| 11            | 6             | 0           | -3.083348 | -3.159047 | 0.337508  |
| 12            | 6             | 0           | 2.993084  | 3.409182  | 2.590968  |
| 13            | 6             | 0           | -3.091803 | -3.147691 | -1.036333 |
| 14            | 6             | 0           | 2.948887  | 4.296689  | 1.332418  |
| 15            | 6             | 0           | 4.347834  | 3.569549  | 3.301547  |
| 16            | 1             | 0           | 0.610488  | -0.609020 | 3.102907  |
| 17            | 1             | 0           | -0.365394 | -1.141050 | -1.646458 |
| 18            | 1             | 0           | 0.958673  | 0.054818  | -0.381071 |
| 19            | 1             | 0           | -1.358735 | -1.716905 | 4.193047  |
| 20            | 1             | 0           | 0.869089  | 3.591268  | 3.074651  |
| 21            | 1             | 0           | 1.899066  | 3.135665  | 4.460515  |
| 22            | 1             | 0           | 1.918202  | 4.808034  | 3.844922  |
| 23            | 1             | 0           | 1.986788  | 4.196795  | 0.819875  |
| 24            | 1             | 0           | 3.692073  | 1.364779  | 2.425837  |
| 25            | 1             | 0           | 4.404348  | 2.924376  | 4.190592  |
| 26            | 1             | 0           | -3.859841 | -3.669020 | 0.903641  |
| 27            | 1             | 0           | -3.868505 | -3.659168 | -1.600384 |
| 28            | 1             | 0           | 3.081887  | 5.344566  | 1.631956  |
| 29            | 1             | 0           | 3.750786  | 4.021622  | 0.635241  |
| 30            | 1             | 0           | 4.464847  | 4.609811  | 3.626781  |
| 31            | 1             | 0           | 5.177924  | 3.327152  | 2.621989  |

|     |    |     |           |           |           |  |  |  |  |  |  |
|-----|----|-----|-----------|-----------|-----------|--|--|--|--|--|--|
| 32  | 7  | 0   | -2.149589 | -2.456338 | 2.433748  |  |  |  |  |  |  |
| 33  | 7  | 0   | 2.907035  | 1.962497  | 2.201455  |  |  |  |  |  |  |
| 34  | 8  | 0   | 0.883862  | 1.959096  | 1.105225  |  |  |  |  |  |  |
| 35  | 8  | 0   | 2.133114  | 0.040322  | 1.332693  |  |  |  |  |  |  |
| 36  | 6  | 0   | -1.309602 | -1.720877 | -3.928702 |  |  |  |  |  |  |
| 37  | 1  | 0   | -0.287428 | -2.085112 | -3.749486 |  |  |  |  |  |  |
| 38  | 1  | 0   | -1.377574 | -0.647501 | -3.717155 |  |  |  |  |  |  |
| 39  | 1  | 0   | -1.614235 | -1.931923 | -4.956581 |  |  |  |  |  |  |
| 40  | 8  | 0   | -2.250185 | -2.453476 | -3.100987 |  |  |  |  |  |  |
| 41  | 6  | 0   | 2.019841  | -1.818396 | -0.224285 |  |  |  |  |  |  |
| 42  | 6  | 0   | 2.632445  | -2.822133 | 0.812139  |  |  |  |  |  |  |
| 43  | 6  | 0   | 3.703315  | -5.004829 | -1.114881 |  |  |  |  |  |  |
| 44  | 6  | 0   | 3.505229  | -2.600775 | -1.946271 |  |  |  |  |  |  |
| 45  | 6  | 0   | 4.124859  | -3.033105 | 0.462352  |  |  |  |  |  |  |
| 46  | 6  | 0   | 4.448242  | -6.103494 | -1.288499 |  |  |  |  |  |  |
| 47  | 6  | 0   | 4.244831  | -3.606214 | -0.985269 |  |  |  |  |  |  |
| 48  | 6  | 0   | 4.235304  | -0.740755 | -0.592068 |  |  |  |  |  |  |
| 49  | 6  | 0   | 4.832322  | -1.659932 | 0.518631  |  |  |  |  |  |  |
| 50  | 1  | 0   | 1.271822  | -2.348567 | -0.823073 |  |  |  |  |  |  |
| 51  | 1  | 0   | 2.136655  | -3.809607 | 0.731271  |  |  |  |  |  |  |
| 52  | 1  | 0   | 2.612269  | -5.104073 | -1.084395 |  |  |  |  |  |  |
| 53  | 1  | 0   | 2.217907  | -0.323914 | -2.259927 |  |  |  |  |  |  |
| 54  | 1  | 0   | 2.541971  | -2.442720 | 1.841167  |  |  |  |  |  |  |
| 55  | 1  | 0   | 2.626454  | -3.075213 | -2.406386 |  |  |  |  |  |  |
| 56  | 1  | 0   | 3.998804  | -7.091263 | -1.382563 |  |  |  |  |  |  |
| 57  | 1  | 0   | 4.170830  | -2.273413 | -2.753347 |  |  |  |  |  |  |
| 58  | 1  | 0   | 3.945565  | 0.240747  | -0.218672 |  |  |  |  |  |  |
| 59  | 1  | 0   | 4.581439  | -3.735735 | 1.169347  |  |  |  |  |  |  |
| 60  | 1  | 0   | 4.682423  | -1.212737 | 1.510781  |  |  |  |  |  |  |
| 61  | 1  | 0   | 4.953814  | -0.577741 | -1.404262 |  |  |  |  |  |  |
| 62  | 1  | 0   | 5.535849  | -6.041965 | -1.352589 |  |  |  |  |  |  |
| 63  | 1  | 0   | 5.315091  | -3.623120 | -1.231841 |  |  |  |  |  |  |
| 64  | 1  | 0   | 5.911272  | -1.796692 | 0.370911  |  |  |  |  |  |  |
| 65  | 7  | 0   | 3.041669  | -1.384630 | -1.221110 |  |  |  |  |  |  |
| 66  | 6  | 0   | 0.459822  | 2.424646  | -2.509610 |  |  |  |  |  |  |
| 67  | 6  | 0   | -1.748665 | 1.565373  | -1.720769 |  |  |  |  |  |  |
| 68  | 6  | 0   | -2.268589 | 1.516173  | 0.815664  |  |  |  |  |  |  |
| 69  | 6  | 0   | -2.580915 | 1.174463  | -0.509489 |  |  |  |  |  |  |
| 70  | 6  | 0   | -3.037235 | 0.986063  | 1.857707  |  |  |  |  |  |  |
| 71  | 6  | 0   | -3.690834 | 0.350380  | -0.761519 |  |  |  |  |  |  |
| 72  | 6  | 0   | -4.120418 | 0.136552  | 1.637980  |  |  |  |  |  |  |
| 73  | 6  | 0   | -4.428104 | -0.155090 | 0.308092  |  |  |  |  |  |  |
| 74  | 1  | 0   | 0.000837  | 2.158414  | -3.467032 |  |  |  |  |  |  |
| 75  | 1  | 0   | -0.159434 | 2.125522  | -0.504724 |  |  |  |  |  |  |
| 76  | 1  | 0   | -1.438415 | 2.163498  | 1.073509  |  |  |  |  |  |  |
| 77  | 1  | 0   | -3.950994 | 0.095226  | -1.784155 |  |  |  |  |  |  |
| 78  | 1  | 0   | -4.686770 | -0.289837 | 2.459102  |  |  |  |  |  |  |
| 79  | 7  | 0   | -0.498985 | 2.041769  | -1.460622 |  |  |  |  |  |  |
| 80  | 7  | 0   | -2.637662 | 1.285114  | 3.271614  |  |  |  |  |  |  |
| 81  | 7  | 0   | -5.554517 | -1.104738 | 0.025120  |  |  |  |  |  |  |
| 82  | 8  | 0   | -1.712148 | 2.076785  | 3.445020  |  |  |  |  |  |  |
| 83  | 8  | 0   | -2.190727 | 1.392568  | -2.858539 |  |  |  |  |  |  |
| 84  | 8  | 0   | -3.239279 | 0.694719  | 4.166501  |  |  |  |  |  |  |
| 85  | 8  | 0   | -5.853289 | -1.291992 | -1.151215 |  |  |  |  |  |  |
| 86  | 8  | 0   | -6.079392 | -1.657231 | 0.989622  |  |  |  |  |  |  |
| 87  | 6  | 0   | 1.701429  | 1.537728  | -2.283670 |  |  |  |  |  |  |
| 88  | 8  | 0   | 1.498198  | 0.265615  | -2.693202 |  |  |  |  |  |  |
| 89  | 8  | 0   | 2.713414  | 1.906787  | -1.716274 |  |  |  |  |  |  |
| 90  | 6  | 0   | -0.422494 | 4.845965  | -2.652295 |  |  |  |  |  |  |
| 91  | 6  | 0   | -1.061294 | 4.658095  | -4.040281 |  |  |  |  |  |  |
| 92  | 6  | 0   | 0.007576  | 6.308669  | -2.440503 |  |  |  |  |  |  |
| 93  | 6  | 0   | 0.793644  | 3.921720  | -2.445883 |  |  |  |  |  |  |
| 94  | 1  | 0   | -0.319884 | 4.857132  | -4.830183 |  |  |  |  |  |  |
| 95  | 1  | 0   | -0.850284 | 6.987038  | -2.546062 |  |  |  |  |  |  |
| 96  | 1  | 0   | -1.175438 | 4.595263  | -1.887424 |  |  |  |  |  |  |
| 97  | 1  | 0   | -1.455495 | 3.642420  | -4.175253 |  |  |  |  |  |  |
| 98  | 1  | 0   | -1.894288 | 5.361605  | -4.176516 |  |  |  |  |  |  |
| 99  | 1  | 0   | 0.444613  | 6.455386  | -1.441640 |  |  |  |  |  |  |
| 100 | 1  | 0   | 0.762011  | 6.597706  | -3.188320 |  |  |  |  |  |  |
| 101 | 1  | 0   | 1.269783  | 4.129801  | -1.477242 |  |  |  |  |  |  |
| 102 | 1  | 0   | 1.549332  | 4.133318  | -3.218144 |  |  |  |  |  |  |
| 103 | 11 | 0   | 0.150506  | -3.772272 | 1.885414  |  |  |  |  |  |  |
| 1   | 6  | 0   | -0.456634 | -0.731091 | -2.881639 |  |  |  |  |  |  |
| 2   | 6  | 0   | -0.810292 | -0.896086 | -1.556068 |  |  |  |  |  |  |
| 3   | 6  | 0   | -0.406269 | -2.099174 | -0.888601 |  |  |  |  |  |  |
| 4   | 6  | 0   | -0.656086 | -2.355959 | 0.492754  |  |  |  |  |  |  |
| 5   | 6  | 0   | 0.288059  | -1.741635 | -3.546340 |  |  |  |  |  |  |
| 6   | 6  | 0   | 1.409244  | 4.279520  | -2.548384 |  |  |  |  |  |  |
| 7   | 6  | 0   | -1.626085 | 0.144426  | -0.806265 |  |  |  |  |  |  |
| 8   | 6  | 0   | -0.213153 | -3.543194 | 1.058372  |  |  |  |  |  |  |
| 9   | 6  | 0   | 0.320336  | -3.067092 | -1.671088 |  |  |  |  |  |  |
| 10  | 6  | 0   | -0.563955 | 2.241077  | -1.273699 |  |  |  |  |  |  |
| 11  | 6  | 0   | 0.501645  | 4.958772  | -0.275583 |  |  |  |  |  |  |
| 12  | 6  | 0   | 0.470963  | -4.521206 | 0.279475  |  |  |  |  |  |  |
| 13  | 6  | 0   | 0.728405  | -4.285361 | -1.055792 |  |  |  |  |  |  |
| 14  | 6  | 0   | 0.146565  | 4.620793  | -1.736618 |  |  |  |  |  |  |
| 15  | 6  | 0   | -0.597835 | 5.800902  | -2.384248 |  |  |  |  |  |  |
| 16  | 1  | 0   | -1.146755 | -1.611857 | 1.114160  |  |  |  |  |  |  |
| 17  | 1  | 0   | 1.923223  | 3.417548  | -2.112493 |  |  |  |  |  |  |
| 18  | 1  | 0   | -0.735157 | 0.174347  | -3.415317 |  |  |  |  |  |  |
| 19  | 1  | 0   | 0.576842  | -1.600086 | -4.589701 |  |  |  |  |  |  |
| 20  | 1  | 0   | -1.183392 | 0.290230  | 0.179671  |  |  |  |  |  |  |
| 21  | 1  | 0   | 1.036024  | 4.127206  | 0.195309  |  |  |  |  |  |  |
| 22  | 1  | 0   | 2.096786  | 5.134790  | -2.532290 |  |  |  |  |  |  |
| 23  | 1  | 0   | 1.147530  | 4.058523  | -3.592199 |  |  |  |  |  |  |
| 24  | 1  | 0   | 1.147173  | 5.846666  | -0.259156 |  |  |  |  |  |  |
| 25  | 1  | 0   | -0.407088 | 5.166618  | 0.304091  |  |  |  |  |  |  |
| 26  | 1  | 0   | 0.748950  | -5.467258 | 0.746319  |  |  |  |  |  |  |
| 27  | 1  | 0   | 1.257441  | -5.012999 | -1.665722 |  |  |  |  |  |  |
| 28  | 1  | 0   | -1.722871 | 3.623288  | -2.172108 |  |  |  |  |  |  |
| 29  | 1  | 0   | 0.055257  | 6.681341  | -2.392422 |  |  |  |  |  |  |
| 30  | 1  | 0   | -0.872846 | 5.567736  | -3.423282 |  |  |  |  |  |  |
| 31  | 1  | 0   | -1.505503 | 6.051799  | -1.816002 |  |  |  |  |  |  |
| 32  | 7  | 0   | 0.663554  | -2.876789 | -2.979425 |  |  |  |  |  |  |
| 33  | 7  | 0   | -0.805462 | 3.465365  | -1.775607 |  |  |  |  |  |  |
| 34  | 8  | 0   | 0.465835  | 1.854089  | -0.731476 |  |  |  |  |  |  |
| 35  | 8  | 0   | -1.666974 | 1.416838  | -1.478822 |  |  |  |  |  |  |
| 36  | 6  | 0   | -1.151259 | -3.018693 | 3.229809  |  |  |  |  |  |  |
| 37  | 1  | 0   | -2.180282 | -3.051795 | 2.848211  |  |  |  |  |  |  |
| 38  | 1  | 0   | -0.796745 | -1.982543 | 3.234449  |  |  |  |  |  |  |
| 39  | 1  | 0   | -1.102252 | -3.460180 | 4.229222  |  |  |  |  |  |  |
| 40  | 8  | 0   | -0.300768 | -3.855767 | 2.398534  |  |  |  |  |  |  |
| 41  | 6  | 0   | -3.071425 | -0.367813 | -0.627463 |  |  |  |  |  |  |
| 42  | 6  | 0   | -3.961567 | -0.327433 | -1.900279 |  |  |  |  |  |  |
| 43  | 6  | 0   | -5.020917 | -0.472324 | 0.855283  |  |  |  |  |  |  |
| 44  | 6  | 0   | -6.337492 | -1.936074 | -0.751319 |  |  |  |  |  |  |
| 45  | 6  | 0   | -4.199403 | 1.747397  | 0.190501  |  |  |  |  |  |  |
| 46  | 6  | 0   | -5.996191 | -0.518689 | -0.369565 |  |  |  |  |  |  |
| 47  | 6  | 0   | -7.583168 | -2.418092 | -0.826376 |  |  |  |  |  |  |
| 48  | 6  | 0   | -5.332293 | 0.282317  | -1.531430 |  |  |  |  |  |  |
| 49  | 6  | 0   | -5.109432 | 1.740021  | -1.068049 |  |  |  |  |  |  |
| 50  | 1  | 0   | -2.974939 | -1.399897 | -0.274589 |  |  |  |  |  |  |
| 51  | 1  | 0   | -3.112519 | 0.310361  | 1.397862  |  |  |  |  |  |  |
| 52  | 1  | 0   | -4.077121 | -1.340210 | -2.301198 |  |  |  |  |  |  |
| 53  | 1  | 0   | -4.677646 | -1.472277 | 1.146932  |  |  |  |  |  |  |
| 54  | 1  | 0   | -5.491404 | -2.591832 | -0.976893 |  |  |  |  |  |  |
| 55  | 1  | 0   | -3.491195 | 0.288729  | -2.674559 |  |  |  |  |  |  |
| 56  | 1  | 0   | -3.282199 | 2.322296  | 0.077156  |  |  |  |  |  |  |
| 57  | 1  | 0   | -7.779437 | -3.449455 | -1.116142 |  |  |  |  |  |  |
| 58  | 1  | 0   | -5.477305 | 0.005071  | 1.728670  |  |  |  |  |  |  |
| 59  | 1  | 0   | -4.716675 | 2.114815  | 1.083149  |  |  |  |  |  |  |
| 60  | 1  | 0   | -5.995473 | 0.258134  | -2.403427 |  |  |  |  |  |  |
| 61  | 1  | 0   | -4.635260 | 2.309405  | -1.877514 |  |  |  |  |  |  |
| 62  | 1  | 0   | -6.924122 | 0.003313  | -0.099441 |  |  |  |  |  |  |
| 63  | 1  | 0   | -8.445778 | -1.789081 | -0.599487 |  |  |  |  |  |  |
| 64  | 1  | 0   | -6.073332 | 2.213313  | -0.842424 |  |  |  |  |  |  |
| 65  | 7  | 0   | -3.791986 | 0.329745  | 0.515257  |  |  |  |  |  |  |
| 66  | 6  | 0   | 0.100628  | 0.964488  | 3.044845  |  |  |  |  |  |  |
| 67  | 6  | 0   | 1.750271  | -0.375408 | 1.723233  |  |  |  |  |  |  |
| 68  | 6  | 0   | 3.155517  | 0.750195  | -0.084821 |  |  |  |  |  |  |
| 69  | 6  | 0   | 2.584540  | -0.407149 | 0.467304  |  |  |  |  |  |  |
| 70  | 6  | 0</ |           |           |           |  |  |  |  |  |  |

|     |    |   |           |           |          |
|-----|----|---|-----------|-----------|----------|
| 94  | 1  | 0 | 2.334220  | 4.259990  | 4.317450 |
| 95  | 1  | 0 | 1.725588  | 3.670362  | 5.882840 |
| 96  | 1  | 0 | 1.414098  | 1.090887  | 6.240446 |
| 97  | 1  | 0 | 0.490323  | 3.074248  | 3.155043 |
| 98  | 1  | 0 | 3.423920  | 3.393499  | 5.431111 |
| 99  | 1  | 0 | -0.140574 | 2.368317  | 4.645391 |
| 100 | 1  | 0 | 2.690608  | 1.900173  | 3.561795 |
| 101 | 1  | 0 | 1.918614  | -0.030035 | 4.946046 |
| 102 | 1  | 0 | 3.136685  | 0.912351  | 5.836093 |
| 103 | 11 | 0 | 2.192437  | -3.529078 | 2.352281 |

**I<sub>R</sub>Na<sup>+</sup>**

E(RB97D) = -2718.79542446 A.U.  
 NImag = 0

Zero-point correction= 0.819631 (Hartree/Particle)  
 Thermal correction to Energy= 0.874593  
 Thermal correction to Enthalpy= 0.875537  
 Thermal correction to Gibbs Free Energy= 0.729038  
 Sum of electronic and zero-point Energies= -2717.975794  
 Sum of electronic and thermal Energies= -2717.920831  
 Sum of electronic and thermal Enthalpies= -2717.919887  
 Sum of electronic and thermal Free Energies= -2718.066386

E(RPBE1PBE) = -2717.43650235 A.U.

Standard orientation:

| Center Number | Atomic Number | Atomic Type | Coordinates (Angstroms) |           |           |
|---------------|---------------|-------------|-------------------------|-----------|-----------|
|               |               |             | X                       | Y         | Z         |
| 1             | 6             | 0           | 0.280058                | 0.461426  | -1.731259 |
| 2             | 6             | 0           | 0.373589                | -0.135990 | -2.974928 |
| 3             | 6             | 0           | 1.457234                | 0.438482  | -0.762998 |
| 4             | 6             | 0           | -0.712840               | -0.056319 | -3.885699 |
| 5             | 6             | 0           | -0.936824               | 1.145654  | -1.395991 |
| 6             | 6             | 0           | -1.199762               | 1.750054  | -0.137142 |
| 7             | 6             | 0           | 2.432539                | -1.777238 | -0.758188 |
| 8             | 6             | 0           | 2.537500                | -4.799593 | -1.484135 |
| 9             | 6             | 0           | -1.953665               | 1.202378  | -2.419528 |
| 10            | 6             | 0           | -2.401083               | 2.412824  | 0.086800  |
| 11            | 6             | 0           | 3.726398                | -3.934304 | -1.027875 |
| 12            | 6             | 0           | -3.156263               | 1.910820  | -2.154668 |
| 13            | 6             | 0           | -3.383087               | 2.513161  | -0.932701 |
| 14            | 6             | 0           | 4.976942                | -4.273165 | -1.857390 |
| 15            | 6             | 0           | 4.015803                | -4.134768 | 0.471678  |
| 16            | 1             | 0           | 1.272264                | -0.674089 | -3.263202 |
| 17            | 1             | 0           | 1.111736                | 0.124298  | 0.224485  |
| 18            | 1             | 0           | -0.477635               | 1.679139  | 0.673599  |
| 19            | 1             | 0           | -0.638938               | -0.550235 | -4.856144 |
| 20            | 1             | 0           | 2.336422                | -4.649718 | -2.552721 |
| 21            | 1             | 0           | 1.633248                | -4.551847 | -0.919604 |
| 22            | 1             | 0           | 4.040772                | -2.002750 | -1.951680 |
| 23            | 1             | 0           | 2.780557                | -5.857232 | -1.316756 |
| 24            | 1             | 0           | 4.788031                | -4.120698 | -2.929965 |
| 25            | 1             | 0           | 3.140826                | -3.869312 | 1.074983  |
| 26            | 1             | 0           | -3.904527               | 1.950478  | -2.943276 |
| 27            | 1             | 0           | 5.238661                | -5.326390 | -1.703235 |
| 28            | 1             | 0           | 5.833463                | -3.656785 | -1.547314 |
| 29            | 1             | 0           | -4.320095               | 3.032140  | -0.759151 |
| 30            | 1             | 0           | 4.260581                | -5.189620 | 0.652428  |
| 31            | 1             | 0           | 4.869134                | -3.518339 | 0.785982  |
| 32            | 7             | 0           | -1.834735               | 0.597811  | -3.638101 |
| 33            | 7             | 0           | 3.439988                | -2.486832 | -1.296760 |
| 34            | 8             | 0           | 2.495647                | -0.457575 | -1.201412 |
| 35            | 8             | 0           | 1.578590                | -2.191601 | 0.017389  |
| 36            | 6             | 0           | -3.818045               | 3.649108  | 1.624889  |
| 37            | 1             | 0           | -3.744098               | 3.989152  | 2.663107  |
| 38            | 1             | 0           | -3.918706               | 4.517516  | 0.960222  |
| 39            | 1             | 0           | -4.678594               | 2.976848  | 1.504374  |
| 40            | 8             | 0           | -2.580593               | 2.946901  | 1.352183  |
| 41            | 6             | 0           | 2.054071                | 1.853479  | -0.643339 |
| 42            | 6             | 0           | 2.579816                | 2.492100  | -1.946709 |
| 43            | 6             | 0           | 3.161701                | 3.400357  | 0.887704  |
| 44            | 6             | 0           | 2.073346                | 5.168707  | -0.604229 |
| 45            | 6             | 0           | 3.315983                | 4.351455  | -0.349321 |
| 46            | 6             | 0           | 4.517037                | 1.596373  | -0.098132 |
| 47            | 6             | 0           | 3.721301                | 3.468703  | -1.574062 |
| 48            | 6             | 0           | 2.056726                | 6.504245  | -0.681166 |
| 49            | 6             | 0           | 4.953634                | 2.626435  | -1.174826 |
| 50            | 1             | 0           | 1.242807                | 2.469557  | -0.249878 |
| 51            | 1             | 0           | 2.229533                | 3.558602  | 1.439821  |
| 52            | 1             | 0           | 2.916434                | 1.311420  | 1.268120  |
| 53            | 1             | 0           | 1.753778                | 3.005765  | -2.449664 |
| 54            | 1             | 0           | 1.140918                | 4.613560  | -0.740322 |
| 55            | 1             | 0           | 2.959803                | 1.721014  | -2.629106 |
| 56            | 1             | 0           | 4.002567                | 3.493269  | 1.583551  |
| 57            | 1             | 0           | 4.443826                | 0.582105  | -0.489967 |
| 58            | 1             | 0           | 1.137193                | 7.052784  | -0.880804 |
| 59            | 1             | 0           | 5.173592                | 1.591006  | 0.778254  |
| 60            | 1             | 0           | 3.958796                | 4.119575  | -2.422254 |
| 61            | 1             | 0           | 5.349651                | 2.099596  | -2.051683 |

|     |    |   |           |           |           |
|-----|----|---|-----------|-----------|-----------|
| 62  | 1  | 0 | 4.148363  | 5.039164  | -0.149586 |
| 63  | 1  | 0 | 2.968873  | 7.088680  | -0.548574 |
| 64  | 1  | 0 | 5.746960  | 3.279262  | -0.788308 |
| 65  | 7  | 0 | 3.142152  | 1.965459  | 0.417840  |
| 66  | 6  | 0 | -1.557329 | -0.948099 | 1.850900  |
| 67  | 6  | 0 | 0.670584  | -0.935590 | 3.096053  |
| 68  | 6  | 0 | -1.641816 | -2.090377 | -0.476396 |
| 69  | 6  | 0 | -2.226577 | -1.314548 | 0.538927  |
| 70  | 6  | 0 | -2.327552 | -2.264202 | -1.682261 |
| 71  | 6  | 0 | -3.492225 | -0.747914 | 0.319169  |
| 72  | 6  | 0 | -3.571781 | -1.688139 | -1.935295 |
| 73  | 6  | 0 | -4.130731 | -0.931548 | -0.904572 |
| 74  | 1  | 0 | -0.665993 | -2.553969 | -0.378998 |
| 75  | 1  | 0 | 0.224693  | -1.731199 | 1.220457  |
| 76  | 1  | 0 | 1.427150  | -1.725424 | 3.085546  |
| 77  | 1  | 0 | -3.959841 | -0.151019 | 1.093454  |
| 78  | 1  | 0 | -4.068427 | -1.803602 | -2.892835 |
| 79  | 7  | 0 | -0.268085 | -1.313059 | 2.010215  |
| 80  | 7  | 0 | -1.674419 | -3.063568 | -2.771329 |
| 81  | 7  | 0 | -5.438192 | -0.237020 | -1.141819 |
| 82  | 8  | 0 | -0.553981 | -3.520113 | -2.540662 |
| 83  | 8  | 0 | -2.211783 | -0.311319 | 2.702061  |
| 84  | 8  | 0 | -2.289886 | -3.196580 | -3.823371 |
| 85  | 8  | 0 | -5.894320 | 0.438471  | -0.218314 |
| 86  | 8  | 0 | -5.953239 | -0.364626 | -2.247287 |
| 87  | 6  | 0 | 1.397193  | 0.376476  | 2.658458  |
| 88  | 8  | 0 | 0.732326  | 1.453722  | 2.594920  |
| 89  | 8  | 0 | 2.607564  | 0.252760  | 2.309575  |
| 90  | 6  | 0 | 0.077526  | -0.858897 | 4.509577  |
| 91  | 6  | 0 | -1.253117 | -1.895494 | 6.373244  |
| 92  | 6  | 0 | -0.682255 | -2.122590 | 4.962762  |
| 93  | 6  | 0 | 0.218944  | -3.370399 | 4.932333  |
| 94  | 1  | 0 | -0.584753 | 0.010733  | 4.609113  |
| 95  | 1  | 0 | -1.920164 | -1.020696 | 6.394823  |
| 96  | 1  | 0 | -1.523203 | -2.276077 | 4.272330  |
| 97  | 1  | 0 | -1.827134 | -2.770302 | 6.707636  |
| 98  | 1  | 0 | 0.928922  | -0.690303 | 5.188019  |
| 99  | 1  | 0 | -0.440284 | -1.726179 | 7.096156  |
| 100 | 1  | 0 | 0.568003  | -3.599683 | 3.915676  |
| 101 | 1  | 0 | -0.328569 | -4.247034 | 5.304060  |
| 102 | 1  | 0 | 1.100605  | -3.223613 | 5.575392  |
| 103 | 11 | 0 | -1.423143 | 1.752929  | 3.127668  |

**2<sub>R</sub>Na<sup>+</sup>**

E(RB97D) = -2718.76130063 A.U.  
 NImag = 0

Zero-point correction= 0.818339 (Hartree/Particle)  
 Thermal correction to Energy= 0.873893  
 Thermal correction to Enthalpy= 0.874837  
 Thermal correction to Gibbs Free Energy= 0.724517  
 Sum of electronic and zero-point Energies= -2717.942962  
 Sum of electronic and thermal Energies= -2717.887408  
 Sum of electronic and thermal Enthalpies= -2717.886464  
 Sum of electronic and thermal Free Energies= -2718.036784

E(RPBE1PBE) = -2717.40314546 A.U.

Standard orientation:

| Center Number | Atomic Number | Atomic Type | Coordinates (Angstroms) |           |           |
|---------------|---------------|-------------|-------------------------|-----------|-----------|
|               |               |             | X                       | Y         | Z         |
| 1             | 6             | 0           | -0.020754               | 0.025334  | -1.828143 |
| 2             | 6             | 0           | 0.285865                | 0.930747  | -2.826916 |
| 3             | 6             | 0           | 0.698397                | -2.045412 | -0.588287 |
| 4             | 6             | 0           | 0.917782                | -1.019975 | -1.553004 |
| 5             | 6             | 0           | -0.973416               | 5.053945  | 1.113079  |
| 6             | 6             | 0           | -1.312912               | 0.090680  | -1.039309 |
| 7             | 6             | 0           | 1.523627                | 0.825475  | -3.514900 |
| 8             | 6             | 0           | -1.699996               | 2.232457  | 0.021315  |
| 9             | 6             | 0           | 1.677631                | -2.989156 | -0.352167 |
| 10            | 6             | 0           | 2.156835                | -1.012660 | -2.288323 |
| 11            | 6             | 0           | -2.394474               | 4.534019  | 0.826887  |
| 12            | 6             | 0           | 2.910958                | -2.976301 | -1.048149 |
| 13            | 6             | 0           | -3.079458               | 4.079700  | 2.128870  |
| 14            | 6             | 0           | 3.141478                | -2.001335 | -2.000881 |
| 15            | 6             | 0           | -3.228358               | 5.633211  | 0.146063  |
| 16            | 1             | 0           | -0.233518               | -2.103457 | -0.032010 |
| 17            | 1             | 0           | -0.399586               | 1.739051  | -3.065023 |
| 18            | 1             | 0           | -0.365146               | 4.275975  | 1.586845  |
| 19            | 1             | 0           | -0.484392               | 5.374773  | 0.185902  |
| 20            | 1             | 0           | -1.108380               | -0.159281 | 0.004662  |
| 21            | 1             | 0           | -1.041519               | 5.911401  | 1.795726  |
| 22            | 1             | 0           | 1.764068                | 1.545755  | -2.299361 |
| 23            | 1             | 0           | -2.504347               | 3.281861  | 2.609491  |
| 24            | 1             | 0           | -2.811561               | 3.525058  | -1.038451 |
| 25            | 1             | 0           | -2.752539               | 5.960794  | -0.789339 |
| 26            | 1             | 0           | -3.144363               | 4.932640  | 2.817347  |
| 27            | 1             | 0           | -3.302053               | 6.498418  | 0.815173  |
| 28            | 1             | 0           | 3.662659                | -3.731898 | -0.826040 |
| 29            | 1             | 0           | 4.075894                | -1.966487 | -2.556597 |



|     |    |   |           |           |          |
|-----|----|---|-----------|-----------|----------|
| 92  | 6  | 0 | -0.567781 | -4.625028 | 4.150283 |
| 93  | 6  | 0 | -0.611258 | -3.558808 | 3.040985 |
| 94  | 1  | 0 | -0.285690 | -1.936901 | 4.469903 |
| 95  | 1  | 0 | -0.118603 | -3.391951 | 0.906549 |
| 96  | 1  | 0 | 0.473984  | -4.912904 | 4.359119 |
| 97  | 1  | 0 | -0.553263 | -5.029050 | 1.431608 |
| 98  | 1  | 0 | -1.009726 | -4.246811 | 5.082312 |
| 99  | 1  | 0 | 1.035734  | -4.361968 | 1.868194 |
| 100 | 1  | 0 | -1.116267 | -5.527087 | 3.846849 |
| 101 | 1  | 0 | 1.183788  | -2.563407 | 3.715390 |
| 102 | 1  | 0 | -1.674030 | -3.315243 | 2.865749 |
| 103 | 11 | 0 | 0.919233  | 2.621317  | 2.637411 |

### I<sub>3</sub>Li<sup>+</sup>

E(RB97D) = -2564.07963844 A.U.  
 NImag = 0

Zero-point correction= 0.820565 (Hartree/Particle)  
 Thermal correction to Energy= 0.875058  
 Thermal correction to Enthalpy= 0.876002  
 Thermal correction to Gibbs Free Energy= 0.729957  
 Sum of electronic and zero-point Energies= -2563.259074  
 Sum of electronic and thermal Energies= -2563.204581  
 Sum of electronic and thermal Enthalpies= -2563.203637  
 Sum of electronic and thermal Free Energies= -2563.349682

E(RPBE1PBE) = -2562.76978024 A.U.

Standard orientation:

| Center Number | Atomic Number | Atomic Type | Coordinates (Angstroms) |           |           |
|---------------|---------------|-------------|-------------------------|-----------|-----------|
|               |               |             | X                       | Y         | Z         |
| 1             | 6             | 0           | -0.074532               | 0.830950  | -1.498869 |
| 2             | 6             | 0           | -0.176472               | 0.409156  | -2.811237 |
| 3             | 6             | 0           | 1.234471                | 0.710131  | -0.727073 |
| 4             | 6             | 0           | 2.274261                | -4.412919 | -2.122910 |
| 5             | 6             | 0           | -1.282370               | 1.850859  | 0.464628  |
| 6             | 6             | 0           | -1.232017               | 1.413440  | -0.882795 |
| 7             | 6             | 0           | 2.213132                | -1.478438 | -1.085801 |
| 8             | 6             | 0           | -1.405375               | 0.556396  | -3.509439 |
| 9             | 6             | 0           | -2.450915               | 2.386181  | 0.990695  |
| 10            | 6             | 0           | 3.494384                | -3.565008 | -1.719650 |
| 11            | 6             | 0           | -2.418271               | 1.535254  | -1.695010 |
| 12            | 6             | 0           | 4.647434                | -3.787681 | -2.713259 |
| 13            | 6             | 0           | -3.611743               | 2.539399  | 0.190927  |
| 14            | 6             | 0           | 3.954640                | -2.905455 | -0.289316 |
| 15            | 6             | 0           | -3.583204               | 2.117582  | -1.125580 |
| 16            | 1             | 0           | 0.670795                | -0.050342 | -3.312298 |
| 17            | 1             | 0           | -0.415004               | 1.756947  | 1.113545  |
| 18            | 1             | 0           | 1.946543                | -4.164421 | -3.140409 |
| 19            | 1             | 0           | 1.038554                | 0.282770  | 0.259965  |
| 20            | 1             | 0           | 1.439584                | -4.247576 | -1.434269 |
| 21            | 1             | 0           | 2.551697                | -5.474864 | -2.092205 |
| 22            | 1             | 0           | 3.642877                | -1.553181 | -2.503748 |
| 23            | 1             | 0           | -1.482838               | 0.203310  | -4.539321 |
| 24            | 1             | 0           | 4.336138                | -3.534657 | -3.737276 |
| 25            | 1             | 0           | 3.146291                | -3.734282 | 0.429267  |
| 26            | 1             | 0           | 4.939609                | -4.844054 | -2.697427 |
| 27            | 1             | 0           | 4.243139                | -4.963834 | -0.247791 |
| 28            | 1             | 0           | 5.524869                | -3.183589 | -2.440134 |
| 29            | 1             | 0           | -4.524221               | 2.960030  | 0.601650  |
| 30            | 1             | 0           | 4.823185                | -3.294990 | -0.006667 |
| 31            | 1             | 0           | -4.463969               | 2.208573  | -1.757906 |
| 32            | 7             | 0           | 3.159234                | -2.105178 | -1.806733 |
| 33            | 7             | 0           | -2.491512               | 1.101572  | -2.987969 |
| 34            | 8             | 0           | 1.482382                | -1.986870 | -0.242312 |
| 35            | 8             | 0           | 2.187100                | -0.125217 | -1.414091 |
| 36            | 6             | 0           | -3.601187               | 3.243000  | 2.959283  |
| 37            | 1             | 0           | -3.905168               | 4.181053  | 2.477198  |
| 38            | 1             | 0           | -3.330428               | 3.431269  | 4.002249  |
| 39            | 1             | 0           | -4.409729               | 2.501981  | 2.900076  |
| 40            | 8             | 0           | -2.398892               | 2.729559  | 2.330707  |
| 41            | 6             | 0           | 1.856941                | 2.107210  | -0.540321 |
| 42            | 6             | 0           | 2.295390                | 2.834801  | -1.830672 |
| 43            | 6             | 0           | 3.140800                | 3.520662  | 0.993851  |
| 44            | 6             | 0           | 4.342606                | 1.726944  | -0.194453 |
| 45            | 6             | 0           | 3.519427                | 3.718107  | -1.495314 |
| 46            | 6             | 0           | 2.061192                | 5.441832  | -0.293765 |
| 47            | 6             | 0           | 4.731185                | 2.788753  | -1.259634 |
| 48            | 6             | 0           | 3.265819                | 4.539328  | -0.190469 |
| 49            | 6             | 0           | 2.120928                | 6.778027  | -0.284429 |
| 50            | 1             | 0           | 1.090436                | 2.703068  | -0.038131 |
| 51            | 1             | 0           | 1.457911                | 3.432356  | -2.205768 |
| 52            | 1             | 0           | 2.836399                | 1.427955  | 1.261985  |
| 53            | 1             | 0           | 2.565768                | 2.108672  | -2.607032 |
| 54            | 1             | 0           | 2.251805                | 3.689329  | 1.610736  |
| 55            | 1             | 0           | 4.205909                | 0.732855  | -0.619941 |
| 56            | 1             | 0           | 1.089113                | 4.949211  | -0.385638 |
| 57            | 1             | 0           | 5.009140                | 2.289515  | -2.196039 |
| 58            | 1             | 0           | 4.023747                | 3.531096  | 1.641760  |
| 59            | 1             | 0           | 5.062216                | 1.664504  | 0.628479  |

|     |   |   |           |           |           |
|-----|---|---|-----------|-----------|-----------|
| 60  | 1 | 0 | 3.723749  | 4.411032  | -2.318504 |
| 61  | 1 | 0 | 1.224095  | 7.389627  | -0.372561 |
| 62  | 1 | 0 | 4.153507  | 5.160935  | -0.014754 |
| 63  | 1 | 0 | 5.595545  | 3.375541  | -0.922905 |
| 64  | 1 | 0 | 3.074683  | 7.299919  | -0.188747 |
| 65  | 7 | 0 | 3.024402  | 2.118398  | 0.441816  |
| 66  | 6 | 0 | 0.763810  | -1.045388 | 3.107335  |
| 67  | 6 | 0 | -1.457774 | -0.962320 | 1.980027  |
| 68  | 6 | 0 | -1.770030 | -1.872731 | -0.410699 |
| 69  | 6 | 0 | -2.278492 | -1.264450 | 0.750717  |
| 70  | 6 | 0 | -2.597639 | -2.002560 | -1.527768 |
| 71  | 6 | 0 | -3.606501 | -0.810482 | 0.760020  |
| 72  | 6 | 0 | -3.917421 | -1.550525 | -1.548663 |
| 73  | 6 | 0 | -4.392671 | -0.954565 | -0.381066 |
| 74  | 1 | 0 | 0.149676  | -0.906294 | 4.003281  |
| 75  | 1 | 0 | 0.287050  | -1.698655 | 1.152005  |
| 76  | 1 | 0 | -0.748179 | -2.226787 | -0.492508 |
| 77  | 1 | 0 | -4.010366 | -0.329786 | 1.643517  |
| 78  | 1 | 0 | -4.533778 | -1.633624 | -2.437628 |
| 79  | 7 | 0 | -0.161720 | -1.321675 | 1.988809  |
| 80  | 7 | 0 | -2.025745 | -2.596465 | -2.781024 |
| 81  | 7 | 0 | -5.781641 | -0.385006 | -0.373947 |
| 82  | 8 | 0 | -0.820580 | -2.853564 | -2.783536 |
| 83  | 8 | 0 | -1.990520 | -0.355397 | 2.942185  |
| 84  | 8 | 0 | -2.787625 | -2.767254 | -3.725643 |
| 85  | 8 | 0 | -6.146778 | 0.193621  | 0.649250  |
| 86  | 8 | 0 | -6.447962 | -0.512985 | -1.395012 |
| 87  | 6 | 0 | 1.452470  | 0.314111  | 2.763192  |
| 88  | 8 | 0 | 0.753363  | 1.368122  | 2.908879  |
| 89  | 8 | 0 | 2.608509  | 0.282010  | 2.263513  |
| 90  | 6 | 0 | 0.121149  | -3.562349 | 4.744778  |
| 91  | 6 | 0 | 1.055963  | -3.583167 | 3.521897  |
| 92  | 6 | 0 | 1.735388  | -2.218410 | 3.284474  |
| 93  | 6 | 0 | 2.136334  | -4.668358 | 3.674862  |
| 94  | 1 | 0 | -0.714201 | -2.860150 | 4.611759  |
| 95  | 1 | 0 | -0.304824 | -4.559194 | 4.922575  |
| 96  | 1 | 0 | 0.452722  | -3.824262 | 2.631545  |
| 97  | 1 | 0 | 0.678544  | -3.267219 | 5.647512  |
| 98  | 1 | 0 | 2.381023  | -2.269129 | 2.398502  |
| 99  | 1 | 0 | 2.386911  | -1.979393 | 4.138198  |
| 100 | 1 | 0 | 1.680209  | -5.660633 | 3.794859  |
| 101 | 1 | 0 | 2.754998  | -4.468931 | 4.563033  |
| 102 | 1 | 0 | 2.798902  | -4.695080 | 2.797603  |
| 103 | 3 | 0 | -1.111464 | 1.323921  | 3.183069  |

### I<sub>3</sub>RLi<sup>+</sup>

E(RB97D) = -2564.07519824 A.U.  
 NImag = 0

Zero-point correction= 0.821183 (Hartree/Particle)  
 Thermal correction to Energy= 0.875472  
 Thermal correction to Enthalpy= 0.876416  
 Thermal correction to Gibbs Free Energy= 0.731758  
 Sum of electronic and zero-point Energies= -2563.254015  
 Sum of electronic and thermal Energies= -2563.199727  
 Sum of electronic and thermal Enthalpies= -2563.198782  
 Sum of electronic and thermal Free Energies= -2563.343440

E(RPBE1PBE) = -2562.76590500 A.U.

Standard orientation:

| Center Number | Atomic Number | Atomic Type | Coordinates (Angstroms) |           |           |
|---------------|---------------|-------------|-------------------------|-----------|-----------|
|               |               |             | X                       | Y         | Z         |
| 1             | 6             | 0           | -0.368237               | -0.546409 | -1.640219 |
| 2             | 6             | 0           | -0.350377               | 0.003886  | -2.908232 |
| 3             | 6             | 0           | -1.533388               | -0.307376 | -0.686523 |
| 4             | 6             | 0           | 0.733656                | -1.376504 | -1.247643 |
| 5             | 6             | 0           | 0.870128                | -1.959737 | 0.037050  |
| 6             | 6             | 0           | 0.739623                | -0.262671 | -3.780690 |
| 7             | 6             | 0           | -2.142318               | 2.035640  | -0.724195 |
| 8             | 6             | 0           | -1.791214               | 5.028738  | -1.497499 |
| 9             | 6             | 0           | 1.770266                | -1.601705 | -2.224884 |
| 10            | 6             | 0           | 1.976726                | -2.738794 | 0.345873  |
| 11            | 6             | 0           | -3.093632               | 4.362335  | -1.018695 |
| 12            | 6             | 0           | 2.869071                | -2.434432 | -1.878549 |
| 13            | 6             | 0           | 2.982026                | -2.997418 | -0.620508 |
| 14            | 6             | 0           | -4.287088               | 4.875502  | -1.842436 |
| 15            | 6             | 0           | -3.332891               | 4.625477  | 0.479984  |
| 16            | 1             | 0           | -1.156253               | 0.651345  | -3.242659 |
| 17            | 1             | 0           | -1.143908               | -0.024117 | 0.295066  |
| 18            | 1             | 0           | 0.126264                | -1.781964 | 0.809680  |
| 19            | 1             | 0           | -1.624872               | 4.834745  | -2.564846 |
| 20            | 1             | 0           | -0.931136               | 4.652976  | -0.934334 |
| 21            | 1             | 0           | 0.754871                | 0.190270  | -4.773623 |
| 22            | 1             | 0           | -1.867000               | 6.113491  | -1.345384 |
| 23            | 1             | 0           | -3.695459               | 2.490969  | -1.924092 |
| 24            | 1             | 0           | -4.135273               | 4.682954  | -2.914481 |
| 25            | 1             | 0           | -2.499571               | 4.242218  | 1.078788  |
| 26            | 1             | 0           | -4.385832               | 5.957953  | -1.700965 |
| 27            | 1             | 0           | -5.223725               | 4.399790  | -1.516544 |

|     |   |   |           |           |           |
|-----|---|---|-----------|-----------|-----------|
| 28  | 1 | 0 | 3.634005  | -2.603164 | -2.633775 |
| 29  | 1 | 0 | 3.846279  | -3.608904 | -0.380762 |
| 30  | 1 | 0 | -3.417185 | 5.707389  | 0.645859  |
| 31  | 1 | 0 | -4.264216 | 4.146508  | 0.811745  |
| 32  | 7 | 0 | -3.034272 | 2.883747  | -1.266108 |
| 33  | 7 | 0 | 1.763350  | -1.040297 | -3.469900 |
| 34  | 8 | 0 | -2.406252 | 0.736581  | -1.157838 |
| 35  | 8 | 0 | -1.236657 | 2.318722  | 0.051433  |
| 36  | 6 | 0 | 3.198528  | -3.966915 | 2.055637  |
| 37  | 1 | 0 | 3.033883  | -4.217468 | 3.107688  |
| 38  | 1 | 0 | 3.279222  | -4.886240 | 1.461428  |
| 39  | 1 | 0 | 4.105394  | -3.357506 | 1.943126  |
| 40  | 8 | 0 | 2.029587  | -3.212354 | 1.645918  |
| 41  | 6 | 0 | -2.355507 | -1.601407 | -0.531988 |
| 42  | 6 | 0 | -3.050077 | -2.126447 | -1.808595 |
| 43  | 6 | 0 | -3.674989 | -2.938976 | 1.040958  |
| 44  | 6 | 0 | -4.689186 | -0.874168 | 0.153753  |
| 45  | 6 | 0 | -3.083095 | -4.872120 | -0.513820 |
| 46  | 6 | 0 | -4.358389 | -2.835565 | -1.387501 |
| 47  | 6 | 0 | -4.101396 | -3.806226 | -0.191234 |
| 48  | 6 | 0 | -5.364725 | -1.754807 | -0.932687 |
| 49  | 6 | 0 | -3.368437 | -6.173770 | -0.629057 |
| 50  | 1 | 0 | -1.649470 | -2.356207 | -0.176891 |
| 51  | 1 | 0 | -3.000092 | -0.959116 | 1.427794  |
| 52  | 1 | 0 | -2.760374 | -3.302012 | 1.521661  |
| 53  | 1 | 0 | -2.370259 | -2.810655 | -2.327348 |
| 54  | 1 | 0 | -3.281699 | -1.298969 | -2.490689 |
| 55  | 1 | 0 | -2.054139 | -4.533063 | -0.664594 |
| 56  | 1 | 0 | -4.435099 | 0.122243  | -0.207307 |
| 57  | 1 | 0 | -4.465658 | -2.874682 | 1.796098  |
| 58  | 1 | 0 | -5.291979 | -0.779723 | 1.062961  |
| 59  | 1 | 0 | -2.601161 | -6.906171 | -0.875950 |
| 60  | 1 | 0 | -5.657210 | -1.130983 | -1.786234 |
| 61  | 1 | 0 | -4.766075 | -3.407132 | -2.228118 |
| 62  | 1 | 0 | -5.055611 | -4.294912 | 0.045404  |
| 63  | 1 | 0 | -6.272222 | -2.228401 | -0.536558 |
| 64  | 1 | 0 | -4.383958 | -6.544544 | -0.479451 |
| 65  | 7 | 0 | -3.391852 | -1.525697 | 0.586434  |
| 66  | 6 | 0 | -0.367753 | 0.998565  | 3.143726  |
| 67  | 6 | 0 | 1.733222  | 0.600372  | 1.775751  |
| 68  | 6 | 0 | 1.943723  | 1.722450  | -0.542710 |
| 69  | 6 | 0 | 2.452075  | 0.900776  | 0.478988  |
| 70  | 6 | 0 | 2.640621  | 1.819004  | -1.749059 |
| 71  | 6 | 0 | 3.657610  | 0.213691  | 0.264685  |
| 72  | 6 | 0 | 3.828443  | 1.130296  | -1.994584 |
| 73  | 6 | 0 | 4.315050  | 0.335518  | -0.957250 |
| 74  | 1 | 0 | 1.013423  | 2.272867  | -0.453359 |
| 75  | 1 | 0 | 0.133821  | 1.765904  | 1.260214  |
| 76  | 1 | 0 | -1.016816 | 1.878280  | 3.135395  |
| 77  | 1 | 0 | 4.061806  | -0.430465 | 1.036840  |
| 78  | 1 | 0 | 4.334675  | 1.191561  | -2.952204 |
| 79  | 7 | 0 | 0.562694  | 1.222930  | 2.008067  |
| 80  | 7 | 0 | 2.055903  | 2.654037  | -2.850096 |
| 81  | 7 | 0 | 5.553910  | -0.479776 | -1.189706 |
| 82  | 8 | 0 | 0.968583  | 3.190816  | -2.632881 |
| 83  | 8 | 0 | 2.237029  | -0.230939 | 2.567124  |
| 84  | 8 | 0 | 2.688031  | 2.733288  | -3.897220 |
| 85  | 8 | 0 | 5.932248  | -1.203374 | -0.268484 |
| 86  | 8 | 0 | 6.089228  | -0.389851 | -2.288959 |
| 87  | 6 | 0 | -1.267642 | -0.223560 | 2.788191  |
| 88  | 8 | 0 | -0.731195 | -1.375794 | 2.736032  |
| 89  | 8 | 0 | -2.467846 | 0.024473  | 2.491449  |
| 90  | 6 | 0 | 0.292985  | 0.884123  | 4.526091  |
| 91  | 6 | 0 | 1.859779  | 1.791258  | 6.269445  |
| 92  | 6 | 0 | 1.264330  | 2.031062  | 4.871147  |
| 93  | 6 | 0 | 0.580191  | 3.407852  | 4.796368  |
| 94  | 1 | 0 | 0.817378  | -0.074439 | 4.623050  |
| 95  | 1 | 0 | 2.369284  | 0.818015  | 6.321786  |
| 96  | 1 | 0 | 2.086994  | 2.007957  | 4.141069  |
| 97  | 1 | 0 | 2.588153  | 2.573875  | 6.522004  |
| 98  | 1 | 0 | -0.531100 | 0.876724  | 5.257093  |
| 99  | 1 | 0 | 1.067374  | 1.805616  | 7.033377  |
| 100 | 1 | 0 | 0.224502  | 3.636764  | 3.781680  |
| 101 | 1 | 0 | 1.281319  | 4.200392  | 5.091025  |
| 102 | 1 | 0 | -0.281805 | 3.447384  | 5.480385  |
| 103 | 3 | 0 | 1.101350  | -1.733243 | 2.800334  |

**I<sub>3</sub>K<sup>+</sup>**

E(RB97D)=-3156.53515002 A.U.  
 NImag = 0

Zero-point correction= 0.819906 (Hartree/Particle)  
 Thermal correction to Energy= 0.875170  
 Thermal correction to Enthalpy= 0.876115  
 Thermal correction to Gibbs Free Energy= 0.728215  
 Sum of electronic and zero-point Energies=-3155.715244  
 Sum of electronic and thermal Energies=-3155.659980  
 Sum of electronic and thermal Enthalpies=-3155.659035  
 Sum of electronic and thermal Free Energies=-3155.806935

E(RPBE1PBE)=-3155.00873196 A.U.

Standard orientation:

| Center Number | Atomic Number | Atomic Type | Coordinates (Angstroms) |           |           |
|---------------|---------------|-------------|-------------------------|-----------|-----------|
|               |               |             | X                       | Y         | Z         |
| 1             | 6             | 0           | 0.143106                | 0.053217  | -1.994373 |
| 2             | 6             | 0           | 0.245779                | 0.988911  | -3.009004 |
| 3             | 6             | 0           | -1.114174               | -0.072054 | -1.145918 |
| 4             | 6             | 0           | 1.260588                | -0.807622 | -1.744041 |
| 5             | 6             | 0           | 1.263882                | -1.841457 | -0.766294 |
| 6             | 6             | 0           | 1.456572                | 1.101991  | -3.740836 |
| 7             | 6             | 0           | -2.068195               | 1.953094  | -0.199520 |
| 8             | 6             | 0           | -1.948446               | 4.784610  | 1.054345  |
| 9             | 6             | 0           | 2.447851                | -0.584124 | -2.532801 |
| 10            | 6             | 0           | 2.396838                | -2.622621 | -0.586285 |
| 11            | 6             | 0           | -3.181073               | 4.143510  | 0.389294  |
| 12            | 6             | 0           | 3.604407                | -1.374945 | -2.274123 |
| 13            | 6             | 0           | 3.586082                | -2.371756 | -1.320119 |
| 14            | 6             | 0           | -3.906494               | 5.181756  | -0.483236 |
| 15            | 6             | 0           | -4.139960               | 3.570834  | 1.449830  |
| 16            | 1             | 0           | -0.576353               | 1.664302  | -3.227342 |
| 17            | 1             | 0           | 0.394611                | -2.021903 | -0.141157 |
| 18            | 1             | 0           | -0.830554               | -0.193789 | -0.094092 |
| 19            | 1             | 0           | -1.258565               | 5.168528  | 0.294153  |
| 20            | 1             | 0           | 1.537736                | 1.849539  | -4.532029 |
| 21            | 1             | 0           | -1.423246               | 4.057000  | 1.682020  |
| 22            | 1             | 0           | -2.282144               | 5.617435  | 1.687456  |
| 23            | 1             | 0           | -2.963600               | 3.166271  | -1.528658 |
| 24            | 1             | 0           | -3.228859               | 5.592351  | -1.245323 |
| 25            | 1             | 0           | -3.634891               | 2.805812  | 2.049571  |
| 26            | 1             | 0           | -4.253000               | 6.007957  | 0.148514  |
| 27            | 1             | 0           | 4.494945                | -1.181144 | -2.868392 |
| 28            | 1             | 0           | -4.466162               | 4.377284  | 2.119385  |
| 29            | 1             | 0           | 4.460645                | -2.992247 | -1.135949 |
| 30            | 1             | 0           | -4.782615               | 4.737243  | -0.977914 |
| 31            | 1             | 0           | -5.027775               | 3.133969  | 0.971339  |
| 32            | 7             | 0           | 2.531172                | 0.363622  | -3.511813 |
| 33            | 7             | 0           | -2.771090               | 3.043488  | -0.542599 |
| 34            | 8             | 0           | -1.639542               | 1.678802  | 0.920954  |
| 35            | 8             | 0           | -1.938911               | 1.104701  | -1.289488 |
| 36            | 6             | 0           | 1.252732                | -4.530093 | 0.332743  |
| 37            | 1             | 0           | 0.419858                | -4.039014 | 0.843018  |
| 38            | 1             | 0           | 0.984210                | -4.806039 | -0.695914 |
| 39            | 1             | 0           | 1.555017                | -5.430718 | 0.882774  |
| 40            | 8             | 0           | 2.440362                | -3.680113 | 0.304656  |
| 41            | 6             | 0           | -1.923581               | -1.320711 | -1.556264 |
| 42            | 6             | 0           | -2.799561               | -1.180305 | -2.831327 |
| 43            | 6             | 0           | -3.369392               | -3.157990 | -0.782709 |
| 44            | 6             | 0           | -4.126385               | -4.012517 | -3.044582 |
| 45            | 6             | 0           | -3.935921               | -0.873453 | -0.064245 |
| 46            | 6             | 0           | -4.265393               | -1.519301 | -2.477587 |
| 47            | 6             | 0           | -4.376792               | -2.989991 | -1.966273 |
| 48            | 6             | 0           | -4.738452               | -0.565221 | -1.354669 |
| 49            | 6             | 0           | -5.040702               | -4.886465 | -3.480113 |
| 50            | 1             | 0           | -1.194678               | -2.127671 | -1.678217 |
| 51            | 1             | 0           | -2.165869               | -1.928149 | 0.447982  |
| 52            | 1             | 0           | -2.424817               | -1.850040 | -3.612608 |
| 53            | 1             | 0           | -2.517730               | -3.794235 | -1.048701 |
| 54            | 1             | 0           | -2.743877               | -0.156339 | -3.214346 |
| 55            | 1             | 0           | -3.124364               | -4.015079 | -3.482951 |
| 56            | 1             | 0           | -3.504740               | 0.008062  | 0.409957  |
| 57            | 1             | 0           | -3.842141               | -3.568037 | 0.115362  |
| 58            | 1             | 0           | -4.814894               | -5.600121 | -4.271072 |
| 59            | 1             | 0           | -4.535911               | -1.403002 | 0.684266  |
| 60            | 1             | 0           | -4.571199               | 0.474074  | -1.660575 |
| 61            | 1             | 0           | -4.897510               | -1.400658 | -3.364327 |
| 62            | 1             | 0           | -5.397337               | -3.130328 | -1.583819 |
| 63            | 1             | 0           | -5.810431               | -0.701429 | -1.166872 |
| 64            | 1             | 0           | -6.046037               | -4.911161 | -3.055957 |
| 65            | 7             | 0           | -2.799309               | -1.810308 | -0.405231 |
| 66            | 6             | 0           | -0.189346               | -0.761980 | 3.210328  |
| 67            | 6             | 0           | 1.676181                | 1.907337  | 0.232041  |
| 68            | 6             | 0           | 1.793786                | 0.006378  | 1.967879  |
| 69            | 6             | 0           | 2.301803                | 2.613531  | -0.798576 |
| 70            | 6             | 0           | 2.383327                | 0.890985  | 0.894101  |
| 71            | 6             | 0           | 3.612197                | 2.357850  | -1.202834 |
| 72            | 6             | 0           | 3.709512                | 0.624325  | 0.516285  |
| 73            | 6             | 0           | 4.293757                | 1.354130  | -0.516475 |
| 74            | 1             | 0           | 0.487542                | -0.881888 | 4.061502  |
| 75            | 1             | 0           | -0.125939               | 0.754665  | 1.717234  |
| 76            | 1             | 0           | 0.653934                | 2.165801  | 0.485237  |
| 77            | 1             | 0           | 4.072744                | 2.899217  | -2.021981 |
| 78            | 1             | 0           | 4.269491                | -0.157743 | 1.015991  |
| 79            | 7             | 0           | 0.475697                | 0.120801  | 2.239990  |
| 80            | 7             | 0           | 1.519816                | 3.652812  | -1.535490 |
| 81            | 7             | 0           | 5.695874                | 1.018634  | -0.939119 |
| 82            | 8             | 0           | 0.335026                | 3.797261  | -1.220745 |
| 83            | 8             | 0           | 2.092369                | 4.281249  | -2.418459 |
| 84            | 8             | 0           | 2.525243                | -0.813679 | 2.556616  |
| 85            | 8             | 0           | 6.187406                | 1.690294  | -1.839639 |
| 86            | 8             | 0           | 6.248847                | 0.084487  | -0.360772 |
| 87            | 6             | 0           | -0.419935               | -2.179513 | 2.589968  |
| 88            | 8             | 0           | 0.074696                | -3.164098 | 3.181934  |
| 89            | 8             | 0           | -1.080450               | -2.229655 | 1.496876  |



|     |    |   |           |           |          |
|-----|----|---|-----------|-----------|----------|
| 90  | 6  | 0 | -0.386204 | 1.282743  | 5.478256 |
| 91  | 6  | 0 | -1.516068 | -0.145427 | 3.679866 |
| 92  | 6  | 0 | -1.393652 | 1.256449  | 4.315566 |
| 93  | 6  | 0 | -2.782077 | 1.720563  | 4.788718 |
| 94  | 1  | 0 | 0.632644  | 1.045956  | 5.140989 |
| 95  | 1  | 0 | -0.363063 | 2.277140  | 5.945032 |
| 96  | 1  | 0 | -0.672164 | 0.552763  | 6.251534 |
| 97  | 1  | 0 | -1.046939 | 1.952507  | 3.537309 |
| 98  | 1  | 0 | -1.951645 | -0.838656 | 4.415955 |
| 99  | 1  | 0 | -2.204364 | -0.096874 | 2.824772 |
| 100 | 1  | 0 | -2.743513 | 2.749332  | 5.173131 |
| 101 | 1  | 0 | -3.147639 | 1.069178  | 5.597193 |
| 102 | 1  | 0 | -3.513667 | 1.686967  | 3.968468 |
| 103 | 19 | 0 | 2.670146  | -3.330127 | 3.167386 |

#### I<sub>R</sub>K<sup>+</sup>

E(RB97D) = -3156.53270074 A.U.  
 NImag = 0

Zero-point correction= 0.818995 (Hartree/Particle)  
 Thermal correction to Energy= 0.874129  
 Thermal correction to Enthalpy= 0.875073  
 Thermal correction to Gibbs Free Energy= 0.726861  
 Sum of electronic and zero-point Energies= -3155.713705  
 Sum of electronic and thermal Energies= -3155.658572  
 Sum of electronic and thermal Enthalpies= -3155.657628  
 Sum of electronic and thermal Free Energies= -3155.805840

E(RPBE1PBE) = -3155.00738416 A.U.

Standard orientation:

| Center Number | Atomic Number | Atomic Type | Coordinates (Angstroms) |           |           |
|---------------|---------------|-------------|-------------------------|-----------|-----------|
|               |               |             | X                       | Y         | Z         |
| 1             | 6             | 0           | -0.194362               | -0.896217 | -3.170468 |
| 2             | 6             | 0           | -0.294152               | -0.038402 | -2.089768 |
| 3             | 6             | 0           | 0.930517                | 0.312685  | -1.254053 |
| 4             | 6             | 0           | -1.342283               | -1.196776 | -3.949228 |
| 5             | 6             | 0           | -1.575955               | 0.536505  | -1.790905 |
| 6             | 6             | 0           | -1.837752               | 1.395035  | -0.688120 |
| 7             | 6             | 0           | 2.464567                | -1.527656 | -0.744347 |
| 8             | 6             | 0           | -2.661076               | 0.188659  | -2.679245 |
| 9             | 6             | 0           | 3.080058                | -4.497317 | -0.075146 |
| 10            | 6             | 0           | -3.115960               | 1.910734  | -0.491391 |
| 11            | 6             | 0           | -3.944396               | 0.750373  | -2.448728 |
| 12            | 6             | 0           | 4.055981                | -3.492319 | -0.714805 |
| 13            | 6             | 0           | -4.174126               | 1.601656  | -1.387313 |
| 14            | 6             | 0           | 4.847609                | -4.173198 | -1.844225 |
| 15            | 6             | 0           | 5.019293                | -2.912270 | 0.338177  |
| 16            | 1             | 0           | 0.702049                | 0.195498  | -0.187115 |
| 17            | 1             | 0           | 0.753564                | -1.360928 | -3.422130 |
| 18            | 1             | 0           | -1.065844               | 1.622839  | 0.045136  |
| 19            | 1             | 0           | -1.258116               | -1.895061 | -4.783929 |
| 20            | 1             | 0           | 2.369148                | -4.873400 | -0.820493 |
| 21            | 1             | 0           | 2.525139                | -4.032080 | 0.746152  |
| 22            | 1             | 0           | 3.410810                | -2.250251 | -2.366381 |
| 23            | 1             | 0           | 3.656064                | -5.341716 | 0.325790  |
| 24            | 1             | 0           | 4.167978                | -4.583027 | -2.605131 |
| 25            | 1             | 0           | 4.463099                | -2.394518 | 1.127839  |
| 26            | 1             | 0           | -4.746832               | 0.477419  | -3.130284 |
| 27            | 1             | 0           | -5.171764               | 1.999949  | -1.234905 |
| 28            | 1             | 0           | 5.433292                | -5.000716 | -1.427369 |
| 29            | 1             | 0           | 5.542493                | -3.465425 | -2.319819 |
| 30            | 1             | 0           | 5.590003                | -3.730897 | 0.795413  |
| 31            | 1             | 0           | 5.726945                | -2.213700 | -0.130111 |
| 32            | 7             | 0           | -2.535935               | -0.673466 | -3.730826 |
| 33            | 7             | 0           | 3.301017                | -2.371975 | -1.367506 |
| 34            | 8             | 0           | 2.037371                | -0.543598 | -1.619347 |
| 35            | 8             | 0           | 2.152589                | -1.557102 | 0.445173  |

|     |    |   |           |           |           |
|-----|----|---|-----------|-----------|-----------|
| 36  | 6  | 0 | -4.638545 | 3.192650  | 0.878048  |
| 37  | 1  | 0 | -4.574663 | 3.777299  | 1.803495  |
| 38  | 1  | 0 | -4.984030 | 3.846232  | 0.065105  |
| 39  | 1  | 0 | -5.334133 | 2.352812  | 1.011741  |
| 40  | 8  | 0 | -3.300371 | 2.712206  | 0.618145  |
| 41  | 6  | 0 | 1.336172  | 1.786862  | -1.498003 |
| 42  | 6  | 0 | 2.152540  | 2.059970  | -2.793796 |
| 43  | 6  | 0 | 2.305891  | 3.830743  | -0.525371 |
| 44  | 6  | 0 | 2.792294  | 5.132287  | -2.643743 |
| 45  | 6  | 0 | 3.297122  | 4.062501  | -1.710687 |
| 46  | 6  | 0 | 3.441077  | 1.690384  | -0.096273 |
| 47  | 6  | 0 | 3.473525  | 6.239496  | -2.959311 |
| 48  | 6  | 0 | 3.514013  | 2.685130  | -2.411175 |
| 49  | 6  | 0 | 4.242768  | 1.742103  | -1.424288 |
| 50  | 1  | 0 | 0.407582  | 2.365149  | -1.501361 |
| 51  | 1  | 0 | 1.316141  | 4.256723  | -0.726904 |
| 52  | 1  | 0 | 1.479034  | 2.222137  | 0.579854  |
| 53  | 1  | 0 | 1.591351  | 2.734660  | -3.449303 |
| 54  | 1  | 0 | 1.802678  | 4.965230  | -3.078342 |
| 55  | 1  | 0 | 2.316631  | 1.126562  | -3.341425 |
| 56  | 1  | 0 | 2.675045  | 4.243234  | 0.419022  |
| 57  | 1  | 0 | 3.070076  | 6.978877  | -3.649620 |
| 58  | 1  | 0 | 3.256348  | 0.678051  | 0.265539  |
| 59  | 1  | 0 | 3.926003  | 2.257824  | 0.706314  |
| 60  | 1  | 0 | 4.120617  | 2.831977  | -3.311445 |
| 61  | 1  | 0 | 4.266622  | 4.383639  | -1.305156 |
| 62  | 1  | 0 | 4.313514  | 0.738331  | -1.857642 |
| 63  | 1  | 0 | 4.459434  | 6.437296  | -2.535006 |
| 64  | 1  | 0 | 5.258552  | 2.107817  | -1.230981 |
| 65  | 7  | 0 | 2.099802  | 2.350298  | -0.308168 |
| 66  | 6  | 0 | -1.103231 | -0.455218 | 2.184387  |
| 67  | 6  | 0 | 1.102141  | 0.273680  | 3.086294  |
| 68  | 6  | 0 | -1.185281 | -2.205612 | 0.283276  |
| 69  | 6  | 0 | -1.816224 | -1.282982 | 1.131425  |
| 70  | 6  | 0 | -1.923746 | -2.816410 | -0.736284 |
| 71  | 6  | 0 | -3.183491 | -1.018392 | 0.950346  |
| 72  | 6  | 0 | -3.275933 | -2.554465 | -0.949024 |
| 73  | 6  | 0 | -3.881654 | -1.646777 | -0.077437 |
| 74  | 1  | 0 | -0.135265 | -2.463261 | 0.374530  |
| 75  | 1  | 0 | 0.744131  | -1.109266 | 1.538015  |
| 76  | 1  | 0 | 2.109586  | 0.148382  | 2.664699  |
| 77  | 1  | 0 | -3.682404 | -0.310504 | 1.602057  |
| 78  | 1  | 0 | -3.824967 | -3.017514 | -1.762041 |
| 79  | 7  | 0 | 0.240820  | -0.542630 | 2.216081  |
| 80  | 7  | 0 | -1.220426 | -3.750527 | -1.670927 |
| 81  | 7  | 0 | -5.325745 | -1.301465 | -0.281939 |
| 82  | 8  | 0 | 0.007824  | -3.821925 | -1.575475 |
| 83  | 8  | 0 | -1.757038 | 0.302911  | 2.924585  |
| 84  | 8  | 0 | -1.901759 | -4.368091 | -2.480890 |
| 85  | 8  | 0 | -5.820474 | -0.469110 | 0.480183  |
| 86  | 8  | 0 | -5.914670 | -1.854967 | -1.203449 |
| 87  | 6  | 0 | 0.750013  | 1.789284  | 2.944321  |
| 88  | 8  | 0 | 0.523550  | 2.210802  | 1.734680  |
| 89  | 8  | 0 | 0.650780  | 2.495764  | 3.958159  |
| 90  | 6  | 0 | 1.097988  | -0.232200 | 4.537604  |
| 91  | 6  | 0 | 1.429641  | -2.110335 | 6.177241  |
| 92  | 6  | 0 | 1.503381  | -1.712066 | 4.692553  |
| 93  | 6  | 0 | 2.907642  | -1.995191 | 4.125628  |
| 94  | 1  | 0 | 0.095644  | -0.074188 | 4.956032  |
| 95  | 1  | 0 | 0.426489  | -1.925207 | 6.587415  |
| 96  | 1  | 0 | 0.777005  | -2.326478 | 4.135922  |
| 97  | 1  | 0 | 1.667586  | -3.174998 | 6.311022  |
| 98  | 1  | 0 | 1.786455  | 0.403874  | 5.111203  |
| 99  | 1  | 0 | 2.151440  | -1.523826 | 6.766174  |
| 100 | 1  | 0 | 2.954582  | -1.831714 | 3.040035  |
| 101 | 1  | 0 | 3.198123  | -3.037721 | 4.318321  |
| 102 | 1  | 0 | 3.652675  | -1.343253 | 4.608852  |
| 103 | 19 | 0 | -1.910603 | 2.989445  | 3.103320  |

## 5. References

- S1 Gaussian 09, Revision A.02, M. J. Frisch, G. W. Trucks, H. B. Schlegel, G. E. Scuseria, M. A. Robb, J. R. Cheeseman, G. Scalmani, V. Barone, B. Mennucci, G. A. Petersson, H. Nakatsuji, M. Caricato, X. Li, H. P. Hratchian, A. F. Izmaylov, J. Bloino, G. Zheng, J. L. Sonnenberg, M. Hada, M. Ehara, K. Toyota, R. Fukuda, J. Hasegawa, M. Ishida, T. Nakajima, Y. Honda, O. Kitao, H. Nakai, T. Vreven, J. A. Montgomery, Jr., J. E. Peralta, F. Ogliaro, M. Bearpark, J. J. Heyd, E. Brothers, K. N. Kudin, V. N. Staroverov, R. Kobayashi, J. Normand, K. Raghavachari, A. Rendell, J. C. Burant, S. S. Iyengar, J. Tomasi, M. Cossi, N. Rega, J. M. Millam, M. Klene, J. E. Knox, J. B. Cross, V. Bakken, C. Adamo, J. Jaramillo, R. Gomperts, R. E. Stratmann, O. Yazyev, A. J. Austin, R. Cammi, C. Pomelli, J. W. Ochterski, R. L. Martin, K. Morokuma, V. G. Zakrzewski, G. A. Voth, P. Salvador, J. J. Dannenberg, S. Dapprich, A. D. Daniels, Ö. Farkas, J. B. Foresman, J. V. Ortiz, J. Cioslowski, and D. J. Fox, Gaussian, Inc., Wallingford CT, 2009.
- S2 E. D. Glendening, A. E. Reed, J. E. Carpenter, F. Weinhold, NBO; Version 3.1.
